## RESEARCH ARTICLE

# Cis-regulatory dissection of cone development reveals a broad role for Otx2 and Oc transcription factors

Nicolas Lonfat<sup>1,2,\*</sup>, Su Wang<sup>3,\*</sup>, ChangHee Lee<sup>1</sup>, Mauricio Garcia<sup>1,2</sup>, Jiho Choi<sup>1,2</sup>, Peter J. Park<sup>3</sup> and Connie Cepko<sup>1,2,4,‡</sup>

## ABSTRACT

The vertebrate retina is generated by retinal progenitor cells (RPCs), which produce >100 cell types. Although some RPCs produce many cell types, other RPCs produce restricted types of daughter cells, such as a cone photoreceptor and a horizontal cell (HC). We used genome-wide assays of chromatin structure to compare the profiles of a restricted cone/HC RPC and those of other RPCs in chicks. These data nominated regions of regulatory activity, which were tested in tissue, leading to the identification of many *cis*-regulatory modules (CRMs) active in cone/HC RPCs and developing cones. Two transcription factors, Otx2 and Oc1, were found to bind to many of these CRMs, including those near genes important for cone development and function, and their binding sites were required for activity. We also found that Otx2 has a predicted autoregulatory CRM. These results suggest that Otx2, Oc1 and possibly other OneCut proteins have a broad role in coordinating cone development and function. The many newly discovered CRMs for cones are potentially useful reagents for gene therapy of cone diseases.

**KEY WORDS:** *Cis*-regulatory module, CRM, Enhancer, Chromatin, Gene regulatory network, GRN, Photoreceptor, Cone, Horizontal cell, Retina, Otx2, OneCut, Chick

## INTRODUCTION

During development, retinal progenitor cells (RPCs) divide to give rise to an extremely complex and highly organized tissue. The retina is composed of six major types of neurons that are born in a stereotypical and overlapping order, conserved across vertebrates (Cepko, 2014). How RPCs produce such a diversity is a question of interest, both for our understanding of the development of a complex tissue, and for therapeutic applications. Retinal diseases involving cones are common, with many genetic lesions leading to the dysfunction, and sometimes the death, of these photoreceptors (Campochiaro and Mir, 2018; <https://sph.uth.edu/retnet/>). As cones are the type of photoreceptor that we use to initiate color and daylight vision, their loss can be devastating. A better understanding of the gene regulatory networks (GRNs) that lead to cone genesis and cone gene regulation may benefit cell or gene therapeutic approaches.

<sup>1</sup>Department of Genetics, Blavatnik Institute; Harvard Medical School, Boston, MA 02115, USA. <sup>2</sup>Department of Ophthalmology, Blavatnik Institute; Harvard Medical School, Boston, MA 02115, USA. <sup>3</sup>Department of Biomedical Informatics, Blavatnik Institute; Harvard Medical School, Boston, MA 02115, USA. <sup>4</sup>Howard Hughes Medical Institute, Harvard Medical School, Boston, MA 02115, USA.

\*These authors contributed equally to this work

‡Author for correspondence (cepko@genetics.med.harvard.edu)

 N.L., 0000-0001-7078-3301; S.W., 0000-0002-9463-6530; C.H.L., 0000-0002-9994-3142; C.C., 0000-0002-9945-6387

Handling Editor: François Guillemot

Received 13 November 2020; Accepted 31 March 2021

Many RPCs are multipotent, capable of giving rise to combinations of many types of retinal cells, as shown by lineage studies in several species (Livesey and Cepko, 2001). These observations have raised the question of whether all RPCs are equivalent (Cepko, 2014). In mice, RPCs that express the basic helix-loop-helix (bHLH) transcription factor (TF) Olig2 were shown to be terminally dividing, producing only cones and horizontal cells (HCs) embryonically, and only rods and amacrine cells postnatally (Hafler et al., 2012). Zebrafish cones and HCs also were shown to share a common lineage, through live imaging of RPCs expressing a reporter for the cone gene, *thyroid hormone receptor beta* (*thrb*) (Suzuki et al., 2013). Similarly, we have previously characterized a *cis*-regulatory module (CRM) for *Thrb*, designated CRM1, expressed in chick RPCs biased to the production of HCs and photoreceptors (Emerson et al., 2013; Schick et al., 2019).

We discovered that ThrbCRM1 is directly co-regulated by the TFs Otx2 and Oc1 (also known as OneCut1) (Emerson et al., 2013). Genetic studies in mice showed that OneCut genes (*Oc*), of which there are three in mice, are required beyond photoreceptors, as *Oc1* and *Oc2* are involved in retinal ganglion cell and HC development (Sapkota et al., 2014). Null mutations of *Otx2* showed that it is required for both rod and cone development in mice (Nishida et al., 2003). Interestingly, Otx2 is also required for bipolar cell (BP) and HC fates (Koike et al., 2007; Nishida et al., 2003; Sato et al., 2007), even though it is not expressed in HCs, and HCs do not share specific features with photoreceptors.

To further investigate the molecular mechanisms that restrict an RPC to the production of cones and HC, we used ThrbCRM1 as an entry point. Genome-wide methods were used to examine the chromatin status and transcriptomes of ThrbCRM1+ RPCs versus those of ThrbCRM1– RPCs. Thousands of DNA sequences were differentially open in ThrbCRM1+ RPCs, with motifs for Otx2 and Oc TFs showing the most differential enrichment within these regions. The activity of many of the predicted CRMs with these TF binding sites (TFBSs) was tested in retinal tissue, which showed them to be active in early cones and/or the cone/HC RPCs. The CRM activity of most of these sequences was found to be dependent on the binding sites of both Otx2 and Oc TFs, and thousands of other predicted binding sites for Otx2 and Oc TFs were validated via chromatin binding assays using antibodies to Otx2 and Oc1. In addition, we searched for the CRMs that regulate Otx2 and Oc1 and found that Otx2 likely regulates itself. These findings show that Otx2 and Oc TFs coordinate the development of cones, likely via the direct regulation of multiple genes important for the development and function of this cell type.

## RESULTS

### Integrating RNA expression and open chromatin to discover CRMs for cone development

In order to perform a genome-wide search for potential CRMs for developing cones, we used ATAC-seq to profile the open chromatin

regions in early embryonic chick retinal tissue. To enrich for RPCs that were producing cones, and for newly postmitotic cells fated to be cones, freshly explanted embryonic day (E) 5 retinas were co-electroporated with the ThrbCRM1-GFP plasmid and the broadly expressed plasmid CAG-mCherry. After 2 days in culture, the electroporated cells were sorted by fluorescence-activated cell sorting (FACS) into ThrbCRM1+/CAG-mCherry+ (referred to as ThrbCRM1+) and ThrbCRM1-/CAG-mCherry+ (referred to as ThrbCRM1-) cell populations. We processed them for ATAC-seq to identify regions of chromatin that were differentially open in ThrbCRM1+ cells relative to those of ThrbCRM1- cells (Fig. 1A). Profiles were highly reproducible among the three and two replicates for the ThrbCRM1+ and ThrbCRM1- cells, respectively, and we combined the replicates for the comparison of their chromatin accessibility.

Overall, open chromatin profiles were highly concordant between ThrbCRM1+ and ThrbCRM1- cells (Fig. 1A; Table S1). We subtracted the aligned ATAC-seq peak reads of ThrbCRM1- from those of ThrbCRM1+ to generate a difference profile (Fig. 1A). Peaks were then called using this profile to nominate regions either enriched in ThrbCRM1+ or ThrbCRM1- cells (Table S1). We intersected these peaks with the original sets of peaks for each condition, to identify them as ThrbPos high, ThrbNeg high or shared peaks (Fig. 1A,B; Table S1). Although ThrbPos high peaks and ThrbNeg high peaks were more open in ThrbCRM1+ and ThrbCRM1- cells, respectively, these regions tended to be accessible in both populations (Fig. 1B).

We compared these ATAC-seq profiles with the RNA-seq data available from the same cell populations (Buenaventura et al., 2018) (Fig. 1A; Table S2). The Binding and Expression Target Analysis (BETA) (Wang et al., 2013) was used to examine the expression of genes within a window of 100 kb of an ATAC-seq peak (Fig. 1C; Table S2). Overall, ThrbPos high peaks were more likely to be open around genes that were upregulated in ThrbCRM1+ cells relative to ThrbCRM1- cells. Conversely, ThrbNeg high peaks were associated with genes that were upregulated in ThrbCRM1- cells. The shared peaks were open around genes that were expressed in both populations at similar levels (Fig. 1C; Table S2).

We then searched for enriched TFBS motifs in differential peaks that might contribute to the regulation of the differentially expressed genes. We identified motifs predicted in both ThrbPos high and ThrbNeg high enriched peaks (Table S3), and filtered out the cognate TFs that were not expressed in these cells (Fig. 1D). Only a few predicted motifs were differentially enriched in each population. Interestingly, motifs for Otx2 and Oc, the TFs regulating Thrb via the ThrbCRM1 enhancer, were among the most differential predicted TFBSs, enriched strongly within ThrbPos high peaks (Fig. 1D). The binding sites for the proneural TF Neurog2 and for the TF Gtf2ird1 were more enriched in ThrbPos high peaks. Gtf2ird1 has been shown to modulate photoreceptor gene expression, to pattern cone opsin expression in cooperation with Thrb and to be crucial for photoreceptor function (Masuda et al., 2014). A motif for the TF Neurod1, important in cone development (Liu et al., 2008) and highly upregulated in ThrbCRM1+ cells, was found in both ThrbPos and ThrbNeg high peaks (Fig. 1D). TFBSs that were enriched in ThrbCRM1- cells included motifs for *Sox4*, *Zic*, *Sp*, *Pax2*, *Nfe2l1*, or *E2f* cell cycle genes. Motifs for the progenitor genes, *Vsx2* and *Rax*, which are expressed at a higher level in ThrbCRM1- cells, were predicted in both cell populations (Fig. 1D).

#### Identification of Otx2 and Oc1 regulatory elements using ATAC-seq

Multiple differential ATAC-seq peaks were found around genes more highly expressed in the ThrbCRM1+ cells (Fig. 1C). We first compared

the open chromatin profiles of the ThrbCRM1+ and ThrbCRM1- cells at the *Otx2* and *Oc1* loci. We selected peaks of open chromatin near *Otx2* that were specifically enriched in ThrbCRM1+ cells (Fig. 1A). To test whether these regions indeed have regulatory activities, we cloned the corresponding regions into the Stagia3 reporter plasmid driving GFP and placental alkaline phosphatase (PLAP) (Billings et al., 2010). The plasmids were electroporated along with a co-electroporation control (CAG-mCherry) into E5 chick retinas, which were then cultured for 2 days. Alkaline phosphatase (AP) staining was performed to assess the activity of the potential CRMs. Two CRMs near the *Otx2* gene induced strong AP signal (Fig. 2A) and were designated Otx2 CRM E and F (Figs 1A and 2A).

To assess CRM activity at cellular resolution, GFP expression was examined in tissue sections of electroporated retinas. Otx2 CRM E and F were active in cells on the apical side of the retina, with the morphology and location of developing photoreceptor cells. The majority of these cells also were positive for visinin (72±5% for Otx2 CRM E, *n*=4, and 69%±15% for Otx2 CRM F, *n*=5; mean±s.d.) (Fig. 2B,C), a marker of photoreceptors (Hatakenaka et al., 1985; Yamagata et al., 1990) with a slightly later onset of expression than Thrb (Trimarchi et al., 2008). In addition, Otx2 CRM F showed expression in a minor population of cells localized more basally (Fig. 2C), where newborn HCs or cycling RPCs can localize (Baye and Link, 2008; Edqvist and Hallböök, 2004). The majority of the cells expressing GFP from Otx2 CRM E (95±2%, *n*=3) or CRM F (87±3%, *n*=3) contained Otx2 protein, as detected using immunohistochemistry (IHC). The most basal Otx2 CRM F-positive cells contained Otx2 protein expressed at lower levels (Fig. 2B,C). Using a Td-Tomato reporter for Otx2 CRM E, we also observed that all Otx2 CRM E-positive cells were positive for Otx2 CRM F (100%, *n*=2) (Fig. S1A). These observations are consistent with these CRMs acting as enhancers for the *Otx2* gene primarily within RPCs and developing photoreceptor cells.

Using deletion analysis, we refined the minimal DNA sequence necessary for Otx2 CRM E and F activity (Fig. S1B). A 161 bp sequence for region E (named Otx2 CRM E2.1) and a sequence of 410 bp for region F (Otx2 CRM F2) were able to drive AP activity (Fig. 2D; Fig. S1B,C). The TRANSFAC prediction algorithm was used to search for potential TFBSs within the Otx2 CRM E2.1 sequence. Four clusters of TFBSs were identified, which were deleted and tested in the reporter assay (Fig. S1D). The deletion of three out of the four regions resulted in a significant decrease in expression compared with the wild-type (WT) sequence (Fig. 2D). One of the regions had a predicted TFBS for Otx2, which lost almost all expression upon deletion (del3) (Fig. 2D). Interestingly, we recently found an enhancer for the murine *Otx2* gene, named Otx2 O5, which is active in developing cones (Perez-Cervantes et al., 2020), as well as in mature BPs (Chan et al., 2020). In BPs, it showed a similar autoregulation by Otx2 (Chan et al., 2020). When we blasted the chick Otx2 CRM E2.1 sequence to the mouse genome, it was conserved with the mouse Otx2 O5 sequence, and we found that the crucial TFBS deleted in Otx2 CRM E2.1 (del3) corresponded to the TFBS crucial for the mouse Otx2 O5 activity (Fig. 2E).

Using predictions from the ATAC-seq peaks, we also identified regions with CRM activity at the *Oc1* locus (Fig. 3A). Multiple peaks were tested (*n*=13), with nine of them showing AP activity (Fig. 3B; Fig. S2A). Although Oc1 CRM B, J, K and L have not been previously described as potential CRMs, the other CRMs were recently reported in the chick retina (Patoori et al., 2020). The activity of the regions more open in ThrbCRM1+ cells that showed

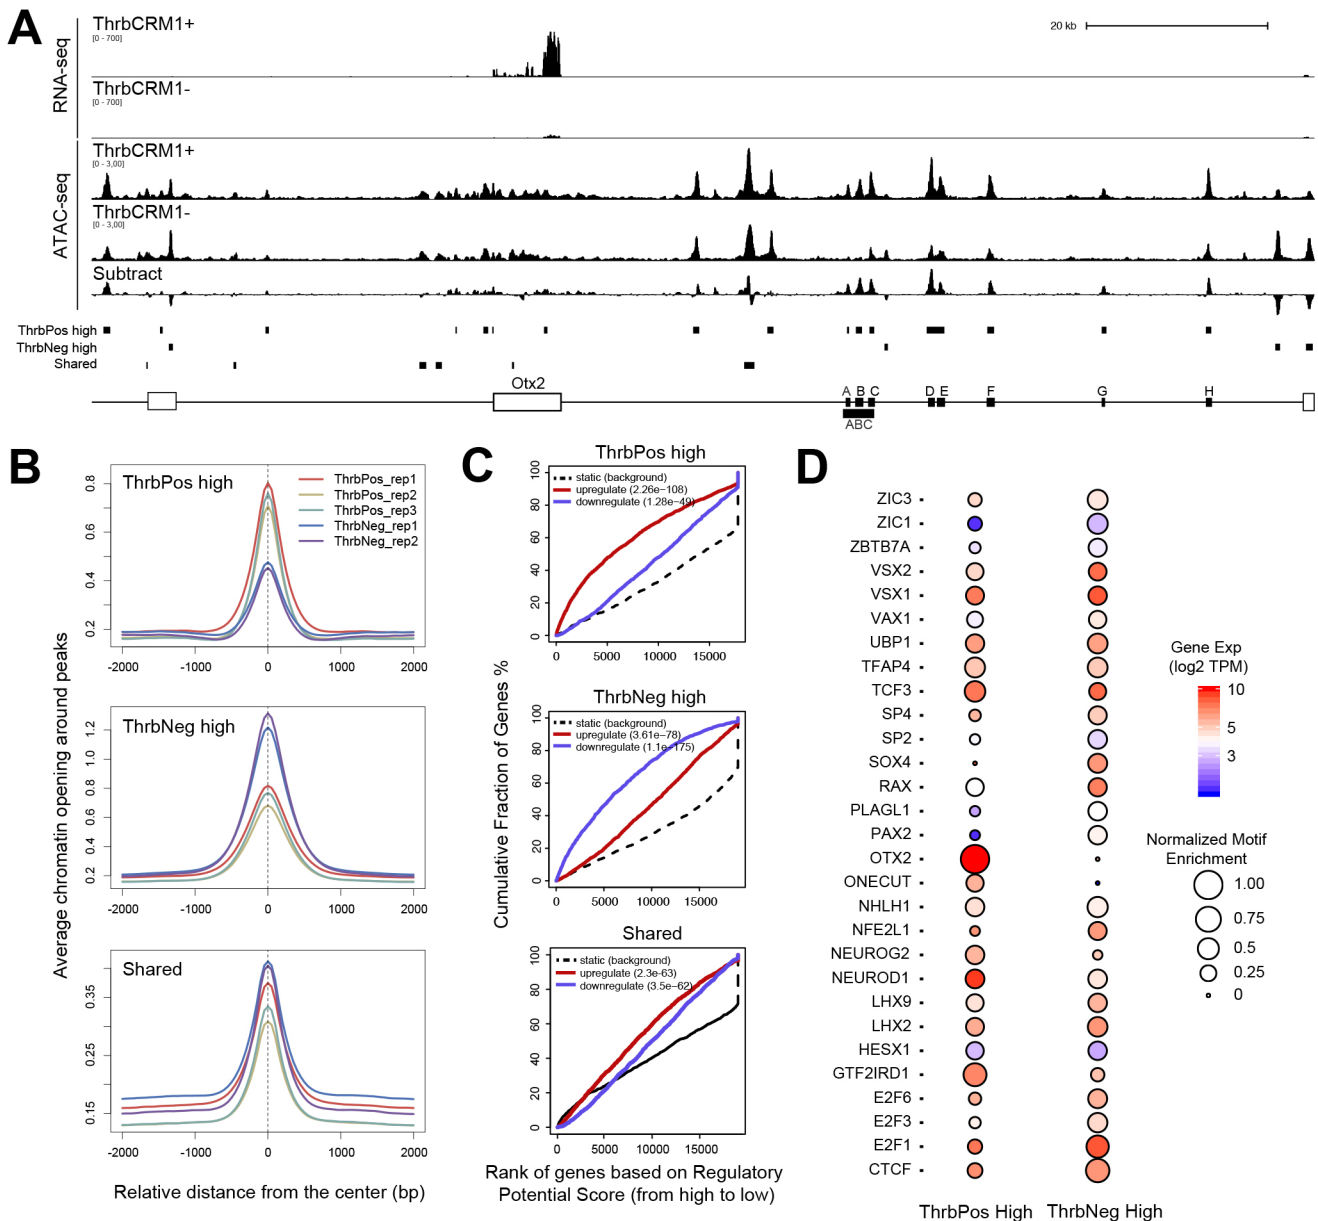

**Fig. 1. Integrating RNA expression and open chromatin for discovery of CRMs.** (A) ATAC-seq data from ThrbCRM1+ and ThrbCRM1- cells from the chick retina were integrated with the corresponding RNA-seq. The *Otx2* locus is shown, with the RNA-seq data on top, followed by the ATAC-seq and the corresponding differential track created by subtraction of the ThrbCRM1- cell peaks from the ThrbCRM1+ cell peaks. ATAC-seq peaks called for ThrbCRM1+ cells (ThrbPos high), ThrbCRM1- cells (ThrbNeg high) or that were shared between conditions (bottom) in different replicates. (B) The average chromatin opening across ThrbPos high peaks (top), ThrbNeg high peaks (middle) and peaks shared between conditions (bottom) in the two ThrbCRM cell populations. The colored lines represent upregulated (red) and downregulated (blue) genes in the indicated population of cells. The dashed line indicates the non-differentially expressed genes as background. Genes are accumulated by their rank on the basis of the regulatory potential score from high to low. The regulatory potential shown on the x-axis represents the likelihood of a gene being more highly expressed in the indicated population of cells, calculated by considering both the accessibility and the distance between the gene transcription start site and the ATAC-seq peak (see details in Materials and Methods). *P*-values that represent the significance of the upregulated or downregulated gene group distributions (indicated in key on each graph) are compared with the static gene group using the Kolmogorov–Smirnov test. (D) Comparison of motif enrichment in regions open in ThrbCRM1+ and ThrbCRM1- cells. The size of the circle represents the significance of the motif. Motifs that were not expressed in at least one population were excluded.

the strongest AP staining was then examined using GFP expression within tissue sections (Fig. 3C). These CRMs marked cells in various locations along the radial axis, perhaps marking cells at various developmental stages, e.g. possibly leaving M phase and migrating vitreally, as is the case for HCs. Oc1 CRM A- and L-positive cells were mostly found within the basal region of the

retina, where HCs are found at this stage (Edqvist and Hallböök, 2004). The activity of the Oc1 CRM A was usually seen in cells expressing the Oc1 protein ( $77\pm 1\%$ ,  $n=2$ ), and the Lhx1 protein ( $65\pm 1\%$ ,  $n=2$ ), a marker of HCs (Liu et al., 2000), whereas expression from the Oc1 CRM L colocalized primarily with Oc1 ( $79\pm 2\%$ ,  $n=2$ ). It also colocalized with Lhx1, but so rarely that

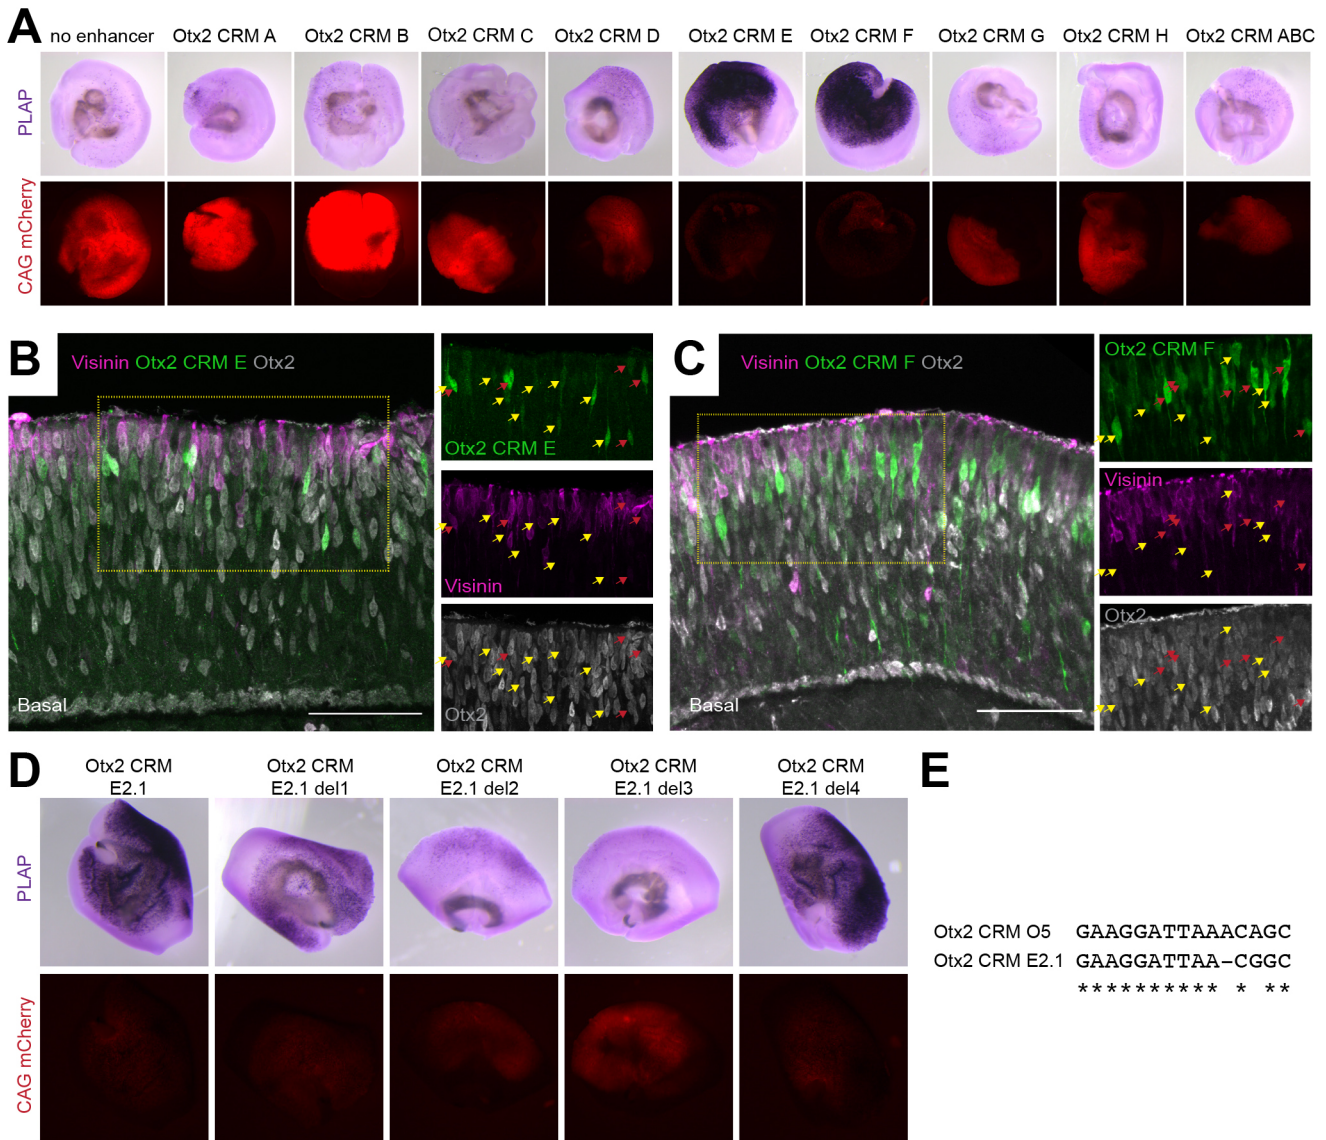

**Fig. 2. Assay of *Otx2* regulatory elements predicted by ATAC-seq.** (A) Potential *Otx2* CRM A-H (Fig. 1A) were assayed for activity by plasmid electroporation in chick retinal explants from E5-E7. Stagia3 plasmid encoding AP and GFP was used to assay for CRM activity (purple stain), and was co-electroporated with a control plasmid (CAG-mCherry, red),  $n=3$ . Corresponding images of each electroporated explant are shown (note that the AP reaction product absorbs the red fluorescent signal). (B,C) Sections of chick retinal explants (E5-E7) electroporated with *Otx2* CRM E (B) and CRM F (C) are shown using the Stagia3 GFP readout. Immunohistochemistry for *Otx2* protein (gray) or visinin (purple), a photoreceptor marker, are shown. Examples of cells with GFP expression that also expressed *Otx2* protein are shown with yellow arrows, with those that also showed visinin indicated with red arrows. The basal side is indicated (all other retinal sections in the study follow the same orientation). (D) Deletion analysis of *Otx2* CRM E was used to identify the crucial nucleotides for activity. The fragment *Otx2* CRM E2.1 was found to be necessary and was searched for potential TFBSs using TRANSFAC. Deletions of four clusters of TFBSs (del1-4) within *Otx2* CRM E2.1 showed that three regions were necessary,  $n=2$ . (E) The sequence deleted in del3 construct had a predicted TFBS for *Otx2*. The del3 sequence is conserved with the mouse *Otx2* O5 CRM that requires *Otx2* TFBS for activity (Chan et al., 2020). Scale bars: 40  $\mu$ m.

quantification was unreliable ( $n=3$ ). A minority of cells positive for these two *Oc1* CRMs had the morphology of early photoreceptors (Fig. 3C). *Oc1* CRM B, J and K were active in cells found in the apical region, also resembling photoreceptors. In these cells, we could not detect *Oc1* protein (Fig. 3C), consistent with a previous report that the gene is turned off as cells leave the RPC state and become photoreceptors (Wu et al., 2012). We also looked at the cellular activity of the *Oc1* CRM G, which showed a similar chromatin accessibility between *ThrbCRM1*<sup>+</sup> and *ThrbCRM1*<sup>-</sup> cells. As described recently for an overlapping CRM, *Oc1* CRM ACR8 (Patoori et al., 2020), the activity of *Oc1* CRM G activity was found excluded from *ThrbCRM1*<sup>+</sup> cells in what could be other

types of RPCs (Fig. S2B). In addition, we found expression driven by *Oc1* CRM G in HCs and cells morphologically resembling retinal ganglion cells (Fig. S2B). Taken together, this set of CRMs, nominated by ATAC-seq peaks, revealed potential regulatory elements for *Otx2* and *Oc1*, operating at overlapping early stages during the development of cones and HCs.

#### Identification of CRMs active in developing cones

We then used the differential ATAC-seq profiles to search for CRMs of other genes related to photoreceptor development, which showed enriched expression in the *ThrbCRM1*<sup>+</sup> population (Fig. 4). Choices were made based upon our interest in genes investigated

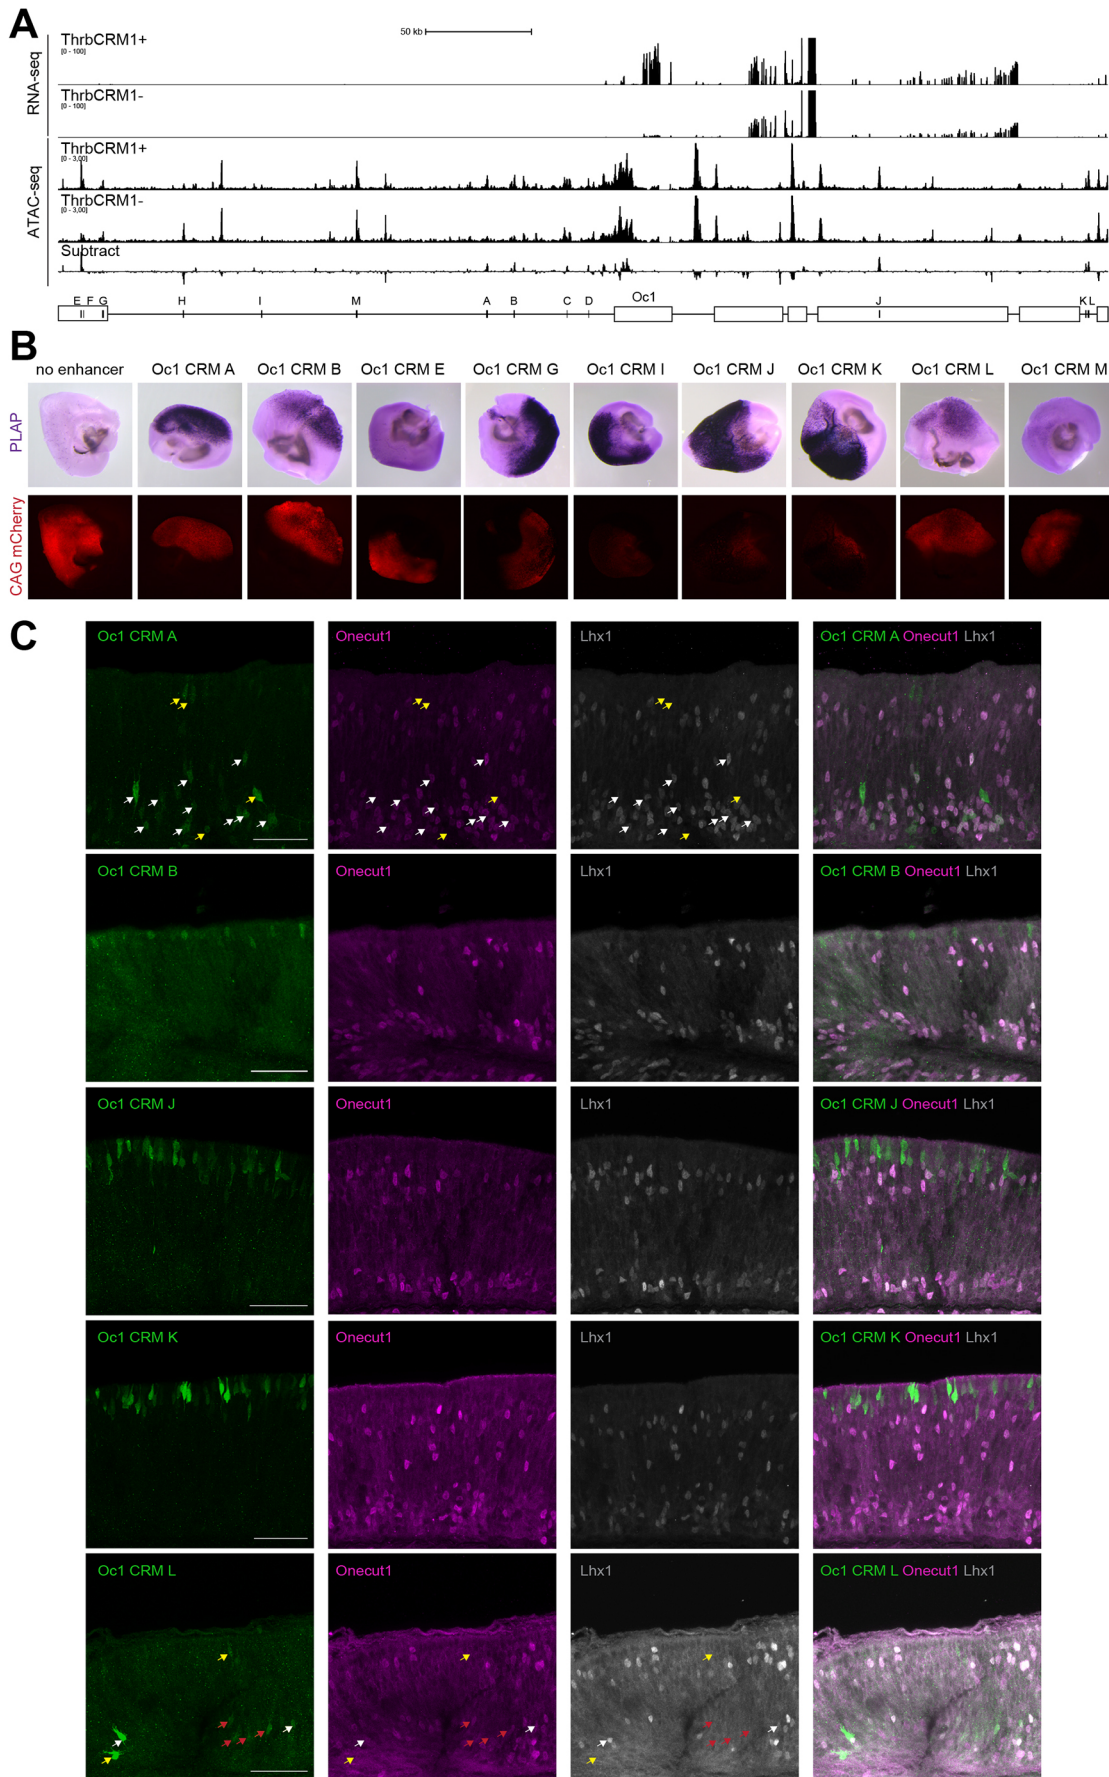

Fig. 3. See next page for legend.

**Fig. 3. Assay of *Oc1* regulatory elements predicted by ATAC-seq.**

(A) ATAC-seq data from *ThrbCRM1+* and *ThrbCRM1-* cells from the chick retina were integrated with the corresponding RNA-seq. The *Oc1* locus is shown, with the RNA-seq data on top, followed by the ATAC-seq data and the corresponding differential track created by subtraction of the *ThrbCRM1-* cell peaks from the *ThrbCRM1+* cell peaks. The regions A-M (black rectangles) which were tested for CRM activity are shown near the *Oc1* gene (white boxes). (B) Potential *Oc1* CRM A-M were assayed for activity by plasmid electroporation in chick retinal explants from E5-E7. *Stagia3* plasmid encoding AP and GFP was used to assay for CRM activity (purple stain), and was co-electroporated with a control plasmid (CAG-mCherry, red),  $n=3$ . Corresponding images of each electroporated explant with CRM activity are shown. (C) Sections of chick retinal explants (E5-E7) electroporated with *Oc1* CRM A,B,J,K and L are shown using the *Stagia3* GFP readout. The apical side of the retina is up and basal is down. Immunohistochemistry for *Oc1* protein (purple) or *Lhx1* (gray), a horizontal cell marker, are shown. Examples of cells with GFP expression that also expressed *Oc1* and *Lhx1* proteins are shown with white arrows, with those that showed *Oc1* but not *Lhx1* are indicated with red arrows, and cells with GFP expression but no overlap with *Oc1* and *Lhx1* are shown with yellow arrows. Scale bars: 40  $\mu\text{m}$ .

previously in our lab and those of other groups, and/or expression at an early time point in cone development, which might indicate regulation in cells transitioning from the cone/HC RPC state.

We tested several differential ATAC-seq peaks at the *Blimp1* locus and three CRMs were found to induce AP activity (Fig. S3A). The chick *Blimp1* CRM A peak was able to drive reporter activity and has conservation with the mouse sequence from B108 (Wang et al., 2014), which we found is also active in the chick retina (Fig. S3A). The *Blimp1* CRM C also had activity, which was further refined to a fragment of 420 bp, called *Blimp1* CRM Cb1 (Fig. S3B). We then looked at the cellular activity of the sequence C and its sub-sequence Cb1, co-electroporating the sequences along with a tdTomato reporter driven by *ThrbCRM1* (*ThrbCRM1*-tdTomato). A strong correlation suggested that both elements were active in cones, as suggested by the presence of visinin in these cells (Fig. 4A; Fig. S3C).

We also identified multiple differential ATAC-seq peaks at the *Nr2e3* locus (Fig. S3D). Two of these elements (*Nr2e3* CRM C and D) overlapped with recently described potential CRMs (Jean-Charles et al., 2018). *Nr2e3* CRM A and F were positive in cones, as shown by their overlap with *ThrbCRM1*-tdTomato activity and colocalization with visinin protein (Fig. 4A). *Nr2e3* CRM A showed broader activity, as it was active in cells negative for *ThrbCRM1* and visinin (Fig. 4A).

We tested four ATAC-seq peaks enriched in the *ThrbCRM1+* cells that are near the *Rbp4* gene, using the AP reporter assay in retinal explants. Three peaks were positive for AP expression (Fig. S3E). *Rbp4* CRM A and D led to a strong enrichment of GFP expression in cells of the photoreceptor layer that also labeled with expression of *ThrbCRM1*-tdTomato and IHC for visinin (Fig. 4A). Cells positive for *Rbp4* CRM C were more basal and rarely showed co-localization with visinin (Fig. S3G).

Two regions near *Gngt2* were identified as more open in *ThrbCRM1+* cells, and were found to drive AP activity (Fig. S3F). A recent study in the mouse retina showed that a reporter for mouse *Gngt2* (mGngt2Enh1) showed activity in both cones and rods (Jean-Charles et al., 2018). *Gngt2* CRM A in the chick showed conservation with mGngt2Enh1. An overlap between *ThrbCRM1*-tdTomato and *Gngt2* CRM B suggested that the peaks for *Gngt2* were active in cells that were cones (Fig. 4A).

*Rxrg* RNA is also strongly enriched in *ThrbCRM1+* cells. *Rxrg* is a partner of *Thrb*, and is required for proper cone opsin regulation (Roberts et al., 2005). We identified a potential CRM near the

promoter of *Rxrg*. An enhancer, *Rxrg208*, active in chick photoreceptors and HCs, was previously identified within this peak (Blixt and Hallböök, 2016) (Fig. 4B). We then asked whether *ThrbCRM1* and *Rxrg208* were active in the same cells. Two *Stagia3* plasmids with these two CRMs were co-electroporated and found to have a strong overlap in their activity, likely in cones and HCs, as well as their progenitor cells (Fig. 4C). Although cells rarely showed expression driven only by *ThrbCRM1*, a larger number of cells showed expression driven only by *Rxrg208*. This pattern suggests that these cells might represent early HCs, which may express *Rxrg* but not *Thrb*, and/or different subtypes of cones (Enright et al., 2015).

***Rxrg* and *Thrb* are part of the same regulatory network**

As *Rxrg* and *Thrb* CRMs showed activity in an overlapping population, we searched for potential upstream TFs of *Rxrg208*. TFBSs for both *Otx2* and *Oc* were predicted by TRANSFAC within the *Rxrg208* sequence (Fig. 5A). To assess the necessity of the *Otx2* and *Oc* binding sites within the *Rxrg208* CRM, we cloned into *Stagia3* the region corresponding to the *Rxrg208* sequence with or without *Oc* and *Otx2* binding sites (Fig. 5B). Although the WT fragment showed strong AP activity, the absence of the binding site for either *Oc* or *Otx2* led to almost no expression (Fig. 5B). These findings were confirmed by FACS analyses using the GFP readout of the *Stagia3* plasmid (Fig. S4A,B). The necessity of these sequences was further tested by mutating the core part of the motif for both TFs and these mutants also exhibited dramatically reduced expression (Fig. 5B). These results suggest that both *Rxrg* and *Thrb* might be regulated by the same upstream TFs, which could facilitate their regulation of cone gene expression and patterning, possibly as heterodimers (Onishi et al., 2010; Roberts et al., 2005).

***Otx2* and *Oc* regulate multiple other genes of the GRNs for cones**

Because the TFBSs for *Otx2* and *Oc* were enriched within the ATAC-seq *ThrbCRM1+* high peaks (Fig. 1D), we asked whether the two TFs might have a broad role in cone development. We analyzed the co-occurrence of the binding sites for both *Otx2* and *Oc* within the differential ATAC-seq peaks genome-wide, and the distance between them. The co-localization of binding sites for both TFs was more common within the *ThrbCRM1+* high peaks compared with the *ThrbCRM1-* high peaks or the shared peaks (Fig. 5C; Fig. S4C,D). We analyzed their co-localization within 100 bp of each other, relative to the closest differentially expressed genes between *ThrbCRM1+* and *ThrbCRM1-* cells, or within a 10 kb or 300 kb distance of their putative targets defined by the BETA analysis (Fig. 1C). Three such differential ATAC-seq peaks associated with the most differentially expressed genes included the CRMs *ThrbCRM1*, *Rxrg208* and a predicted CRM for *Sik1*. Multiple other candidate CRMs were nominated using this analysis (Table S4). To assess whether these predicted CRMs were active, we tested 12 of these sequences. They were chosen as they were related to retinal development, and/or were associated with differentially expressed genes, and/or had a very short distance between the predicted *Otx2* and *Oc* binding sites. We tested the WT sequence and fragments with a deleted *Oc* site for their ability to drive AP expression (Fig. 5D). Ten WT sequences showed AP activity. Seven CRMs showed dependence upon the *Oc* binding site, and three had no reliance upon the *Oc* binding site (Fig. 5D). We tested the effect of deleting the *Otx2* binding site for the fragments showing a dependence on the *Oc* binding site (Fig. 5E). Compared with the WT sequence (Fig. 5D), we observed an almost

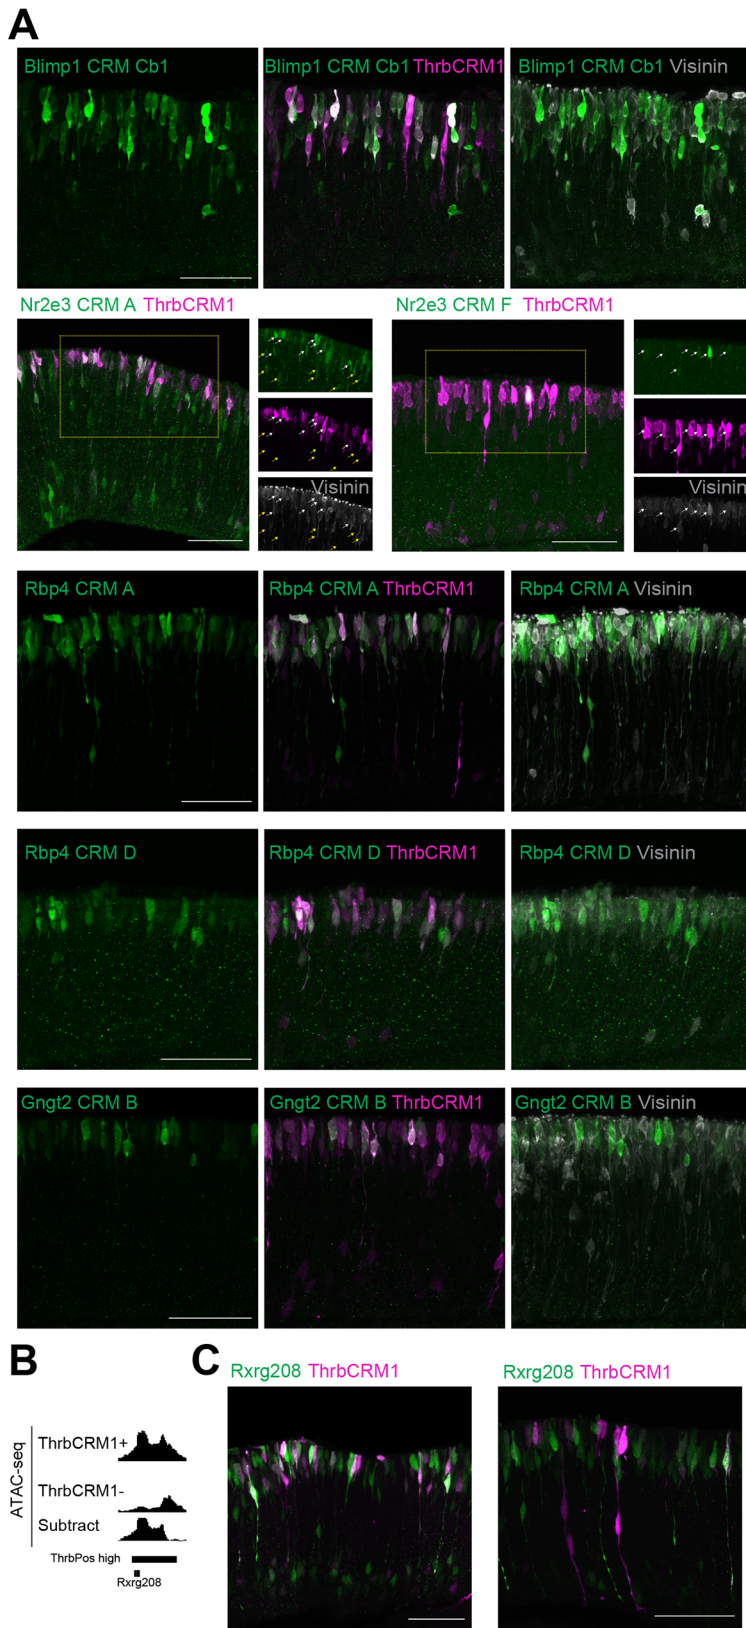

**Fig. 4. Identification of CRMs active in developing cones nominated by differential ATAC-seq peaks.** (A-C) Assay of CRMs nominated by differential ATAC-seq was carried out by Stagia3 plasmid electroporation of chick explants. Co-electroporation of ThrbCRM1-tdTomato was used to mark developing cones/HCs and their RPCs. (A) Blimp1 CRM Cb1, Nr2e3 CRM A, Nr2e3 CRM F, Rbp4 CRM A, Rbp4 CRM D and Gngt2 CRM B (green) were active in cells with the location and morphology of cone photoreceptors, that expressed ThrbCRM1-tdTomato (purple) and expressed the visinin protein (gray). Nr2e3 CRM A also showed activity in cells negative for ThrbCRM1 and visinin (yellow arrows). (B) A differential ATAC-seq peak at the *Rxrg* locus that overlapped with a previously described CRM for *Rxrg*, *Rxrg208* (Blixt and Hallböök, 2016), is shown. (C) The CRM activity of *Rxrg208* (green) and ThrbCRM1 (purple) were compared by co-electroporation of chick explants. The apical side of the retina is up and basal is down in all images. Scale bars: 40  $\mu$ m.

total loss of AP expression upon deletion of the *Otx2* binding site. FACS analysis also showed reduced expression upon deletion of *Oc* or *Otx2* binding sites for the majority of these elements (Fig. S4E).

As *Neurod1* is an important regulator of photoreceptor development, we further analyzed the activity of the *Neurod1*

CRM A. We co-electroporated *Neurod1* CRM A with ThrbCRM1-tdTomato. The activity of *Neurod1* CRM A showed a strong co-localization with the activity of ThrbCRM1, likely in cones and HCs (Fig. 5F). In addition, we electroporated the *Sall1* CRM A, as *Sall1* was shown to be regulated by thyroid hormone and to be

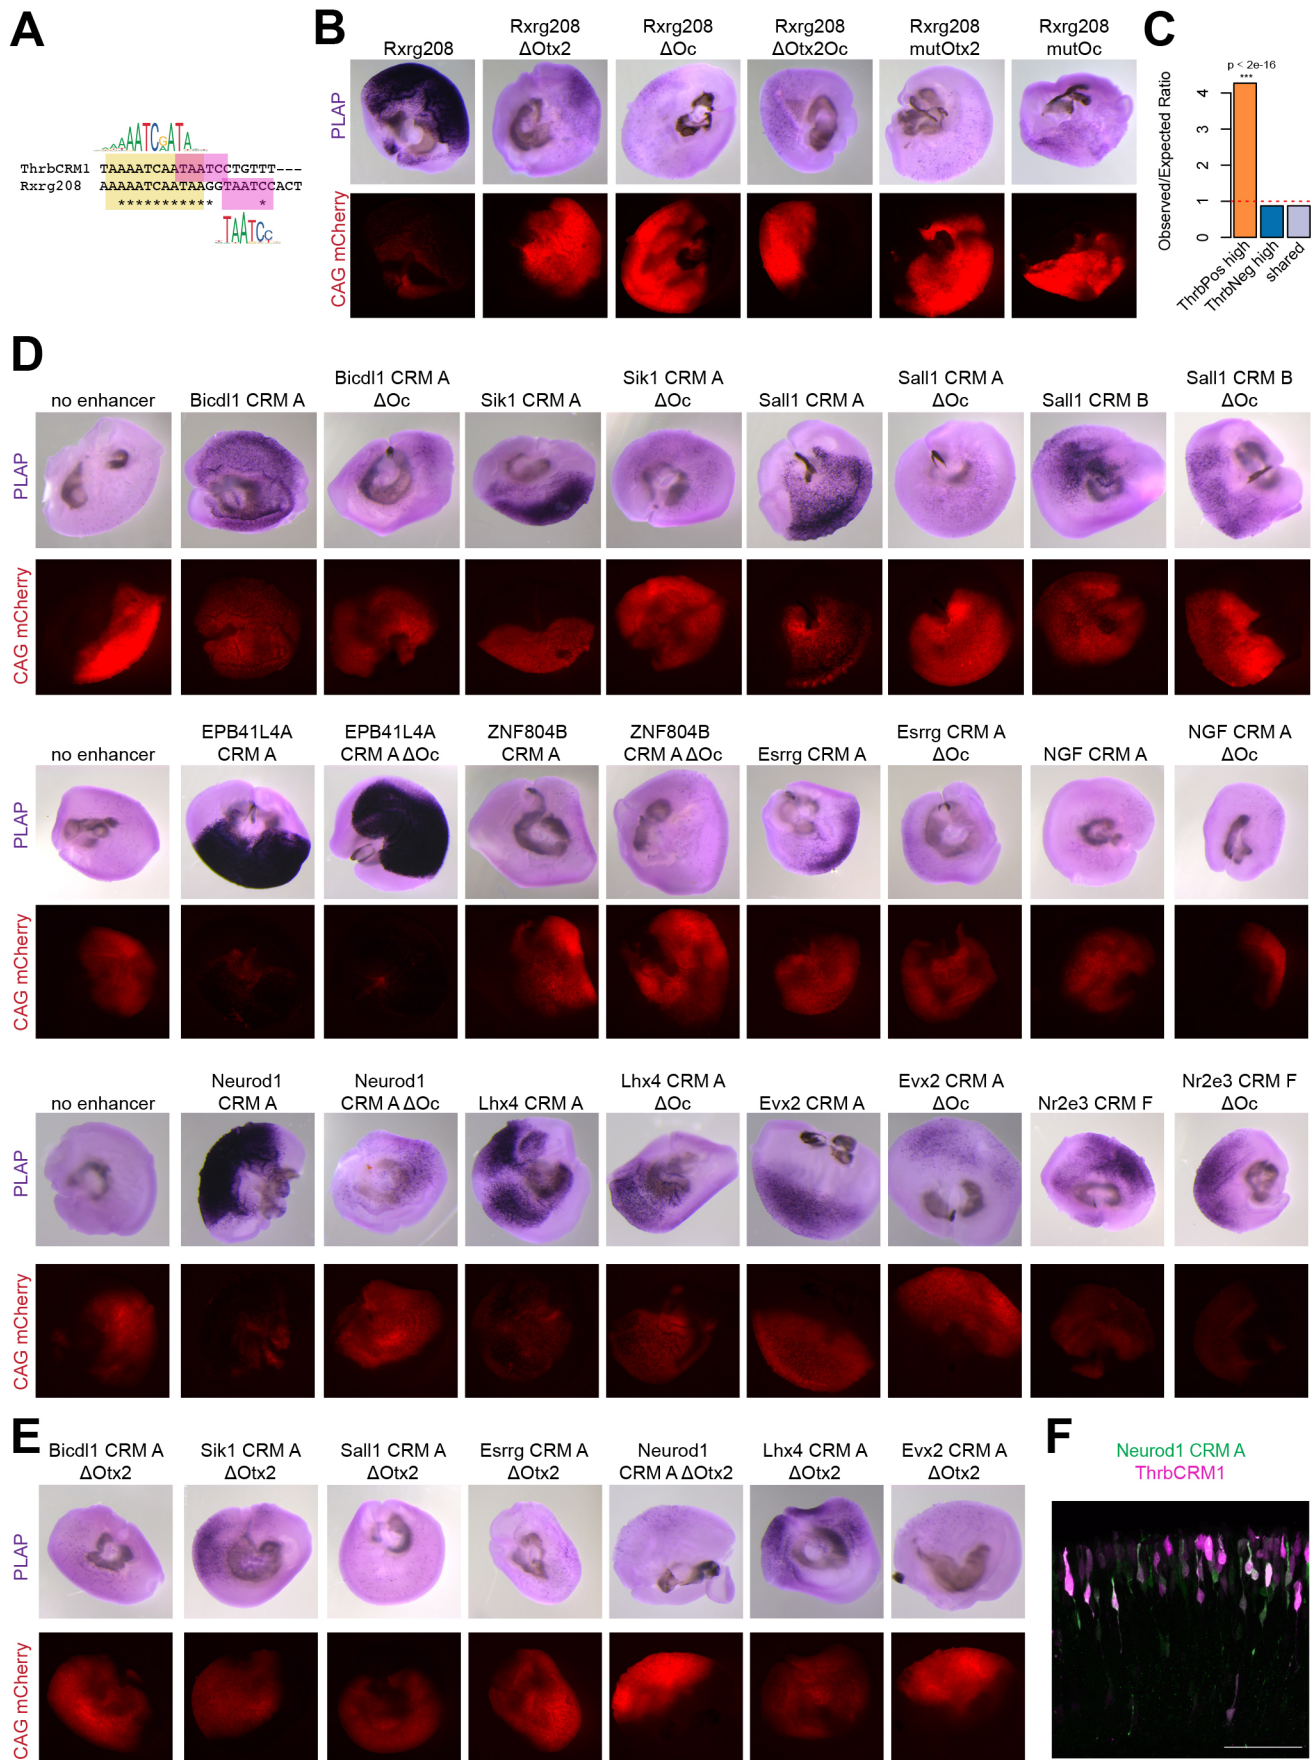

Fig. 5. See next page for legend.



**Fig. 5. Otx2 and Oc regulate multiple genes expressed in developing cones.** (A) A comparison of the predicted TFBSs within the CRMs ThrbCRM1 and Rxrg208, showed binding sites for Otx2 (pink) and Oc (yellow). (B) Deletions and mutations of the Otx2 and Oc sites shown in panel A were made and assayed using plasmid electroporation of chick retinal explants ( $n=2-3$ ). (C) An analysis of the co-occurrence of the TFBSs of Otx2 and Oc in ThrbPos high, ThrbNeg high and shared peaks between ThrbCRM1+ and ThrbCRM1- cells. Observed/expected (O/E) ratio is calculated to measure the co-occurrence, the  $P$ -value is calculated using the Fisher's exact-test (see details in Materials and Methods). (D) CRMs nominated by the co-occurrence of Otx2 and Oc binding sites within 100 bp were tested for activity using the plasmid electroporation assay. Deletions of the predicted Oc sites were made, as indicated, to test for the necessity of this site ( $n=2-3$ ). (E) Regions that showed a dependence on the Oc binding site (panel D) were also tested for the necessity of the Otx2 binding site ( $n=2-3$ ). (F) Neurod1 CRM A activity (green) was assayed by plasmid electroporation with co-electroporation of ThrbCRM1-tTomato (purple) ( $n=2$ ). Scale bars: 40  $\mu$ m.

expressed in chick cones (Enright et al., 2015; Liu et al., 2007). Sall1 CRM A was active in cones, seen by the morphology of the GFP-positive cells and IHC for the Rxrg protein (Fig. S4F).

To ask whether Otx2 and Oc might regulate the genes identified above, we looked for expression of these potential target genes in cells expressing *Otx2* and *Oc1*. We used single-cell RNA-seq data from the chick retina at a corresponding developmental stage (Ghinia Tegla et al., 2020). We subdivided the cells based upon expression of Otx2 and Oc1, and found that most of the potential target genes with a reasonable detection rate showed expression in at least some of the cells also expressing both *Otx2* and *Oc1*, relative to those cells that did not express *Otx2* and *Oc1* (Fig. 6).

Together, these data strongly suggest that Otx2 and Oc have a larger role than previously recognized in the regulation of genes in the cone/HC RPC and/or newly postmitotic and differentiating cones and HCs.

### Otx2 and Oc1 proteins co-localize on chromatin throughout the genome

In order to test for direct binding by Otx2 and Oc on endogenous sites within chick retinal chromatin, the CUT&RUN assay (Skene and Henikoff, 2017) was carried out using antibodies against Otx2 and Oc1 (Table S5). Antibodies against the repressive histone mark H3K27me3 and non-specific IgG were used as positive and

negative controls, respectively (Fig. S5). To validate the CUT&RUN results, a motif analysis using HOMER was carried out for both sets of peaks (Heinz et al., 2010) (Fig. 7). The top predicted motifs for the Otx2 CUT&RUN were for Otx2, GSC and CRX motif (Fig. 7A). These three homeobox TFs share very similar motifs for their binding. Interestingly, motifs for Cux2 and HNF6, which are the expected motifs for Oc, also were found in the most enriched Otx2-bound sequences, further suggesting that Otx2 and Oc are often found together. Other top predicted motifs were for other homeobox TFs Lhx2/3, Nrx6.1 and Isl1, and, interestingly, the bHLH genes *Neurod1*, *Neurog2*, *Atoh1*, *Ascl1*, *Pf1a* and *Olig2* (Fig. 7A; Table S6). HOMER *de novo* predicted motifs confirmed an enrichment for motifs similar to Otx, bHLH and CUT genes (Fig. 7B). In addition, a motif for nuclear receptors, matching Thrb, was predicted (Table S6). When looking at the motifs enriched within the DNA sequences bound by Oc1, Cux2 and HNF6 were the top known predicted motifs (Fig. 7C). Next were the same homeobox TFs detected as enriched in the sites bound by Otx2, which have very similar binding sites as Otx2 (Fig. 7A,C; Table S6), which again suggests that binding sites occupied by Otx2 and Oc are often found together. We could also find enrichment for the bHLHs identified among the Otx2-bound sequences. A major difference between Otx2-bound and Oc1-bound sequences was the higher enrichment for Sox gene motifs for Oc1 (Fig. 7A,C). The *de novo* motif prediction for Oc1 binding included those related to CUT, Sox, homeoboxes and bHLH genes (Fig. 7D; Table S6).

As predicted from the motif analysis above, Otx2 and Oc1 CUT&RUN peaks showed a very large overlap within the genome (6274 peaks) (Table S5). The list of sites identified as being bound by both Otx2 and Oc1 using CUT&RUN (Table S5) was compared with the list of CRMs suggested to be regulated by these TFs (Table S4). About one-third of them showed actual binding of Otx2 and Oc1. The CUT&RUN binding data and the results from deletion of the binding sites for Otx2 and Oc from the CRM assay (Fig. 5) were compared (Fig. 7E-I; Table 1). The sequence of the ThrbCRM1 element, which is dependent upon both the Otx2 and Oc binding sites, confirmed binding by both Otx2 and Oc1 (Emerson et al., 2013) (Fig. 7E). Otx2 and Oc1 binding also was seen for the CRMs for *Rxrg*, *Sik1*, *Neurod1* and *Esrrg*, all of which showed a loss of activity upon deletion of the Otx2 and Oc binding sites (Figs 5B,D,E and 7E). However, some CRMs that partially lost activity upon deletion of the Oc binding site showed no significant enrichment for binding by Oc1, though they did show Otx2 binding (Fig. 7F). For other CRMs, a change in AP activity was not obvious after the deletion of the Oc binding site, though subtle changes cannot be ruled out, but they were bound by both TFs (Figs 5D and 7G). An additional case was shown by the Sall1 CRM A. Although the deletion of Otx2 and Oc predicted binding sites led to a loss of activity (Fig. 5D,E), the binding of these two TFs was not significantly enriched using CUT&RUN (Fig. 7H). Other CRMs that did not show a major change in AP activity when the Oc binding site was deleted, also, predictably, did not show binding by Oc1 (Fig. 7I).

The genome-wide CUT&RUN assay for Otx2 and Oc1 binding expanded considerably our previous list of candidate CRMs with co-occurrence of the TFBSs, defined by known motifs for Otx2 and Oc. When intersecting the binding data with the ATAC-seq ThrbPos high or ThrbNeg high peaks, we identified several additional potential CRMs regulated by Otx2 and Oc at the *Thrb*, *Rxrg*, *Otx2*, *Oc1*, *Sik1*, *Neurod1* or *Sall1* loci, as well as hundreds of other potential CRMs for other genes. The CUT&RUN binding site data also were inspected for the CRMs shown in Figs 2–4 (Fig. S6). All

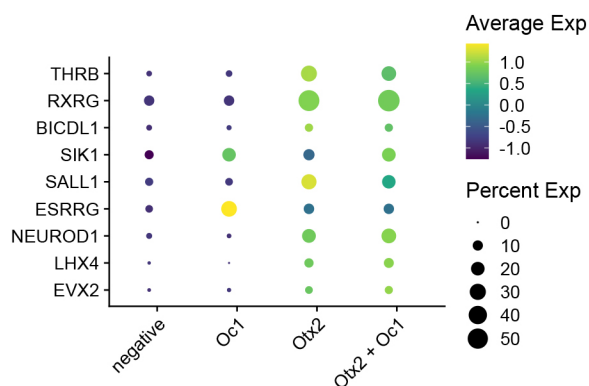

**Fig. 6. Expression of Otx2 and Oc1 in cells expressing genes with predicted regulation by Otx2 and Oc.** Single-cell RNA-seq analysis was carried out on a published dataset (GEO accession number: GSE142244). Retinal cells were subdivided by the detection of *Otx2* and/or *Oc1* transcripts. The average expression (by intensity) and fraction of cells having genes predicted to be regulated by Otx2 and Oc (Fig. 5) detected are shown along with *Otx2* or *Oc1* expression.

**A** Known motif enrichment results *Otx2* CUT&RUN

| Rank | Motif | Name             | P-value | #Targets | %Targets |
|------|-------|------------------|---------|----------|----------|
| 1    |       | GSC(Homeobox)    | 1e-338  | 1765.0   | 12.35%   |
| 2    |       | Otx2(Homeobox)   | 1e-313  | 1278.0   | 8.94%    |
| 3    |       | CRX(Homeobox)    | 1e-256  | 2504.0   | 17.52%   |
| 4    |       | NeuroD1(bHLH)    | 1e-239  | 1010.0   | 7.07%    |
| 5    |       | NeuroG2(bHLH)    | 1e-234  | 1661.0   | 11.62%   |
| 6    |       | Atoh1(bHLH)      | 1e-227  | 1292.0   | 9.04%    |
| 7    |       | Olig2(bHLH)      | 1e-215  | 1831.0   | 12.81%   |
| 8    |       | Lhx3(Homeobox)   | 1e-170  | 2245.0   | 15.71%   |
| 9    |       | Lhx2(Homeobox)   | 1e-165  | 1600.0   | 11.19%   |
| 10   |       | Nkx6.1(Homeobox) | 1e-160  | 3107.0   | 21.74%   |
| 13   |       | Ascl1(bHLH)      | 1e-127  | 1289.0   | 9.02%    |
| 15   |       | Ptf1a(bHLH)      | 1e-97   | 1929.0   | 13.50%   |
| 16   |       | Cux2(Homeobox)   | 1e-97   | 584.0    | 4.09%    |
| 17   |       | HNF6(Homeobox)   | 1e-96   | 637.0    | 4.46%    |
| 18   |       | Isl1(Homeobox)   | 1e-91   | 1913.0   | 13.38%   |
| 26   |       | Sox3(HMG)        | 1e-63   | 1061.0   | 7.42%    |

**C** Known motif enrichment results *Oc1* CUT&RUN

| Rank | Motif | Name             | P-value | #Targets | %Targets |
|------|-------|------------------|---------|----------|----------|
| 1    |       | Cux2(Homeobox)   | 1e-938  | 1843.0   | 12.94%   |
| 2    |       | HNF6(Homeobox)   | 1e-902  | 1915.0   | 13.44%   |
| 3    |       | Nkx6.1(Homeobox) | 1e-150  | 3063.0   | 21.50%   |
| 4    |       | Lhx3(Homeobox)   | 1e-144  | 2129.0   | 14.94%   |
| 5    |       | Lhx2(Homeobox)   | 1e-135  | 1430.0   | 10.04%   |
| 6    |       | Lhx1(Homeobox)   | 1e-110  | 1505.0   | 10.56%   |
| 7    |       | Sox3(HMG)        | 1e-107  | 1339.0   | 9.40%    |
| 8    |       | AT1G20910(ARID)  | 1e-98   | 1859.0   | 13.05%   |
| 9    |       | Atoh1(bHLH)      | 1e-93   | 817.0    | 5.73%    |
| 10   |       | Sox3(HMG)        | 1e-92   | 679.0    | 4.77%    |
| 12   |       | NeuroG2(bHLH)    | 1e-83   | 1108.0   | 7.78%    |
| 13   |       | Isl1(Homeobox)   | 1e-82   | 1730.0   | 12.14%   |
| 16   |       | Olig2(bHLH)      | 1e-70   | 1283.0   | 9.01%    |
| 17   |       | NeuroD1(bHLH)    | 1e-68   | 584.0    | 4.10%    |
| 19   |       | Nanog(Homeobox)  | 1e-65   | 3105.0   | 21.80%   |
| 21   |       | Ascl1(bHLH)      | 1e-55   | 895.0    | 6.28%    |

**B** *de novo* motif enrichment results *Otx2* CUT&RUN

| Rank | Motif | P-value | %Targets | Matches to known motifs               |
|------|-------|---------|----------|---------------------------------------|
| 1    |       | 1e-385  | 18.59%   | Otx1, Gsc2, Gsc, Otx2, bcd            |
| 2    |       | 1e-248  | 7.54%    | Neurog2, Neurod1, Olig2, Atoh1, Ascl1 |
| 3    |       | 1e-116  | 3.18%    | Cux2, Hnf6, Oneuc3, Cux1, Oneuc1      |
| 4    |       | 1e-81   | 0.40%    | Hnmpa12, Hnmpa1, Hnmpa2b1             |
| 5    |       | 1e-74   | 8.81%    | Sox2, Sox3, Sox10, Sox4, Sox9         |

**D** *de novo* motif enrichment results *Oc1* CUT&RUN

| Rank | Motif | P-value | %Targets | Matches to known motifs               |
|------|-------|---------|----------|---------------------------------------|
| 1    |       | 1e-1000 | 8.42%    | Hnf6, Cux2, Cux1, Oneuc1, Oneuc2      |
| 2    |       | 1e-227  | 10.59%   | Sox3, Sox17, Sox15, Sox10, Sox2       |
| 3    |       | 1e-172  | 14.29%   | Lhx1, Lhx2, Lhx8, Emx2, Vxs2          |
| 4    |       | 1e-99   | 5.42%    | Neurog2, Tcf12, Neurod1, Ascl1, Olig2 |
| 5    |       | 1e-72   | 0.37%    | Nrf, Nrf1, Fus3, Rbfox1, Lec2         |

**E**

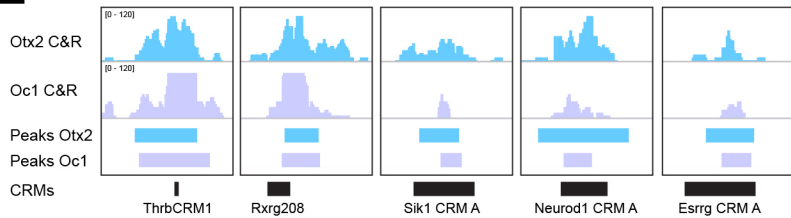

**F**

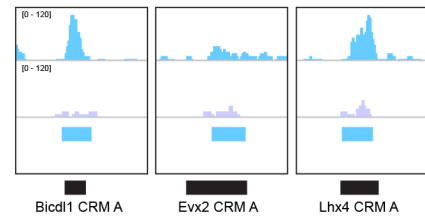

**G**

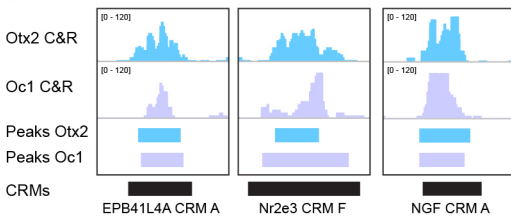

**H**

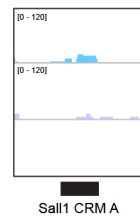

**I**

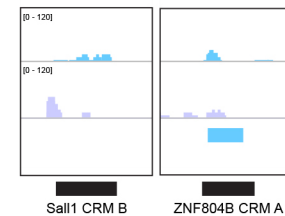

Fig. 7. See next page for legend.

of the regions tested for activity at the *Otx2* locus, except for *Otx2* CRM G, showed enrichment for *Otx2* binding, further suggesting that *Otx2* auto-regulates its expression (Fig 2D,E; Fig. S6A) (Chan et al., 2020). Some CRMs for *Oc1* also showed *Oc1* binding,

consistent with auto-regulation (Fig. S6B). CRMs for *Rbp4* were bound by *Otx2* but not *Oc1* (Fig. S6C). Similarly, the *Gngt2* CRM A and B showed *Otx2* binding only (Fig. S6D). The *Blimp1* CRM A and *Nr2e3* CRM F were bound by both *Otx2* and *Oc1* (Fig. S6E,F).

**Fig. 7. Genome-wide binding of Otx2 and Oc1 proteins assayed by CUT&RUN.** (A-I) Binding of Otx2 and Oc1 was evaluated by a CUT&RUN experiment using Otx2 and Oc1 antibodies on E5 whole-chick retina. (A) The top motifs bound by Otx2 were identified using HOMER, and were for Otx2, GSC and CRX, all homeoboxes related to *Otx2*. Other frequent motifs were for other homeobox TFs, and for the bHLH TFs, Neurod1, Neurog2 and Olig2. Motifs for Oc (Cux, HNF6) were also found to be enriched. (B) An analysis for *de novo* motif enrichment gave results that matched the known motifs for Otx, bHLH and Cut TFs predicted by HOMER. (C) A HOMER analysis of sequences bound by Oc1 showed enrichment for Cux2 and HNF6 TFs, the known motifs for Oc. Homeobox and bHLH motifs bound by Otx2 also were identified as being bound by Oc1, along with Sox motifs. (D) An analysis for *de novo* motif enrichment gave results that matched the known Cux2 and HNF6 predicted by HOMER. (E,F) CUT&RUN (C&R) profiles were analyzed for Otx2 (light blue) and Oc1 (purple) binding within the CRMs identified as new targets of Otx2 and Oc (Fig. 5). Peaks called using MACS2 are shown with boxes under the peaks. ThrbCRM1, Rxrg208, Sik1 CRM A, Neurod1 CRM A and Esrrg CRM A showed binding for both TFs (E), whereas Bidd1 CRM A, Evx2 CRM A and Lhx4 CRM A showed binding of only Otx2 (F), although deletion of the Oc binding site showed a decrease in AP activity (Fig. 5). (G) CRMs that did not show a strong decrease in AP staining upon deletion of the Oc binding site but were bound by both TFs. (H) The Sall1 CRM A had activity dependent upon Otx2 and Oc binding sites but was not found to be bound by these TFs using CUT&RUN. (I) Sall1 CRM B and ZNF804B CRM A did not show reliance on the Oc binding site for activity and were not bound by Oc1.

## DISCUSSION

In this study, we explored the molecular underpinnings of the formation of two early retinal cell types, with a focus on cone photoreceptors, a vulnerable cell type that is crucial for color vision. We comprehensively examined the chromatin landscape relative to differential RNA expression, as well as tested many potential CRMs, in cone/HC RPCs and their newly postmitotic progeny. We identified crucial sequences within these CRMs by making mutations of predicted binding motifs for Otx2 and Oc TFs. Binding by these TFs was further confirmed by genome-wide chromatin binding assays. The data from these unbiased approaches show that Otx2 and Oc likely directly regulate a broad range of genes expressed in these early cell types, in many cases acting on sites that are located relatively close together. These data are in keeping with expression analyses and functional tests that show the necessity of *Otx2*, and in some cases, *Oc* genes, in human stem cell cultures (Welby et al., 2017), and in mice and chicks (Koike et al., 2007; Nishida et al., 2003; Sapkota and Mu, 2015; Sato et al., 2007)

for cone and HC development. The prediction that they directly regulate a broad range of genes important for the development and function of these cell types provides a mechanism for their key roles in development. It is worth noting that Oc2 may contribute as well. *Oc2* is expressed in some of the same cells as *Oc1* or *Otx2* (Ghinia Tegla et al., 2020), and binds to a similar site as Oc1 (Furuno et al., 2008; Harada et al., 1995; Lannoy et al., 1998). Although the CUT&RUN data presented here used an antibody reported to be specific to Oc1 (Klimova et al., 2015), this does not rule out a role for Oc2 as well.

It was interesting to see that the chromatin profiles of ThrbCRM1+ and ThrbCRM1- cells were very similar. The ThrbCRM1- population is presumed to be composed primarily of RPCs and their newly postmitotic daughters, as electroporation preferentially targets these cell types (Matsuda and Cepko, 2004). A fraction of these cells, however, might become ThrbCRM1+, and thus may show some aspects of chromatin structure that overlap with those of ThrbCRM1+ cells. In addition, they might not have activated the ThrbCRM1 reporter at a high enough level to be selected by FACS. High-level expression from this reporter appears to require a multimerized CRM1 sequence (Souferi and Emerson, 2019), which we have noted sometimes suffers deletions during growth of the plasmid in bacteria. The opposite pattern, with peaks that are high in ThrbCRM1- cells also open in ThrbCRM1+ cells, could be due to a lag in the closing of chromatin in certain areas only after cells start to differentiate. Analysis of later time points could address this possibility. Some of the CRMs identified in this study, including those that could serve as negative regulatory elements at some stages/cell types, also could be used to dissect the stages of differentiation of cones and HCs.

Despite the potentially imperfect separation of ThrbCRM1+ and ThrbCRM1- cells, the integration of the differential open chromatin peaks identified by ATAC-seq pointed to potential CRMs for genes preferentially expressed in the ThrbCRM1+ population. This included several new CRMs near the *Otx2* and *Oc1* genes that complement our recent analyses of their regulation in the mouse retina, where we used non-coding RNA and chromatin profiling to nominate CRMs (Chan et al., 2020; Perez-Cervantes et al., 2020). The ATAC-seq differential peaks also provided for a prediction of TFBS motifs enriched in these CRMs, with experimental tests of activity validating these predictions in most

**Table 1. Summary of CRMs tested for regulation by Otx2 and/or Oc**

| CRM tested     | Distance Otx2-Oc | Oc binding site necessary | Otx2 binding site necessary | Bound by Oc1 | Bound by Otx2 |
|----------------|------------------|---------------------------|-----------------------------|--------------|---------------|
| ThrbCRM1       | 0 bp             | Yes                       | Yes                         | Yes          | Yes           |
| Rxrg208        | 2 bp             | Yes                       | Yes                         | Yes          | Yes           |
| Neurod1 CRM A  | 31 bp            | Yes                       | Yes                         | Yes          | Yes           |
| Sik1 CRM A     | 6 bp             | Yes                       | Yes                         | Yes          | Yes           |
| Bidd1 CRM A    | 2 bp             | Yes                       | Yes                         | No           | Yes           |
| ZNF804B CRM A  | 8 bp             | No                        | N/A                         | No           | No            |
| Sall1 CRM A    | 17 bp            | Yes                       | Yes                         | No           | No            |
| Sall1 CRM B    | 35 bp and 20 bp  | No                        | N/A                         | No           | No            |
| Esrrg CRM A    | 12 bp            | Yes                       | Yes                         | Yes          | Yes           |
| EPB41L4A CRM A | 35 bp            | No                        | N/A                         | Yes          | Yes           |
| Lhx4 CRM A     | 0 bp             | Yes                       | Yes                         | No           | Yes           |
| Evx2 CRM A     | 10 bp            | Yes                       | Yes                         | No           | Yes           |
| Nr2e3 CRM F    | 48 bp            | No                        | N/A                         | Yes          | Yes           |
| NGF CRM A      | 2 bp             | No                        | N/A                         | Yes          | Yes           |

For each CRM nominated by the co-occurrence of the predicted Otx2 and Oc binding sites within 100 bp and tested for AP activity (Fig. 5), the distance between the binding sites, the necessity of these binding sites, as well as the enrichment of Otx2 and Oc1 binding as measured by CUT&RUN are shown. Each CRM is named for the inferred target gene from the BETA analysis.

N/A, not applicable.

cases. These series of experiments led to the appreciation of a broader role for *Otx2* and *Oc*, potentially as direct regulators of genes involved in early retinal development.

To directly assess the binding of *Otx2* and *Oc1*, a genome-wide CUT&RUN was used. This assay showed that the two TFs indeed often bind within the same regulatory regions. Direct binding of both TFs near multiple genes important in cone development, including *Thrb*, *Sall1*, *Neurod1* and *Rxrg*, was found. Interestingly, *Rxrg* is a well-described partner of *Thrb*, as the two proteins establish cone opsin patterning, possibly as heterodimers (Onishi et al., 2010; Roberts et al., 2005). We showed that a previously described CRM, *Rxrg208*, is active in terminally dividing RPCs expressing *Thrb*. *ThrbCRM1* and *Rxrg208* were shown to share a much conserved DNA sequence with nearly overlapping binding sites for *Otx2* and *Oc* necessary for their CRM activity. In addition to these two regulators of cone development, a CRM near the *Neurod1* gene showed a strong co-localization of its activity with the activity of the *ThrbCRM1* and was found to be bound by *Otx2* and *Oc1*. This *Neurod1* CRM activity was dependent upon *Otx2* and *Oc* binding sites. *Neurod1* is required for the maintenance of expression of *Thrb* in cones (Liu et al., 2008) and for survival of photoreceptors in mice (Morrow et al., 1999). Furthermore, the motif for *Neurod1* binding showed enrichment within the regions bound by *Otx2* and *Oc1*, genome wide, suggesting that *Neurod1* likely plays a broad role in photoreceptor development, in collaboration with these homeobox TFs. Additional investigation of functional interactions between *Otx2* and *Oc* TFs, e.g. studies asking whether they bind to each other and/or other TFs, as well as their binding patterns, e.g. the importance of the distance between their binding sites, may lead to a deeper understanding of how they play important roles in the development of multiple, distinct retinal cell types.

We found that *Otx2* can bind to several CRMs near the *Otx2* gene, and *Oc1* similarly can bind to regions near *Oc1*. The predicted auto-regulation may enable the patterns observed as cells differentiate, where *Otx2* stays on and *Oc1* goes off in cones, and vice versa in HCs (Bernard et al., 2014; Nishida et al., 2003; Wu et al., 2012). There is likely a role for negative regulation as well. *Otx2* auto-regulation appears to be via the CRM E in early chick retina, as we report here, and via *Otx2* CRM 05 in mouse BP cells, as we reported recently (Chan et al., 2020), with these two CRMs sharing highly conserved sequences. *Otx2* auto-regulation may be a theme for this gene, as it has been proposed in other contexts as well (Matsumoto et al., 2020; Wortham et al., 2014). *Otx2* auto-regulation, as well as its direct binding to CRMs near cone genes, might suggest that *Otx2* is a terminal selector gene (Hobert and Kratsios, 2019) for photoreceptors. However, the fact that *Otx2* is also expressed at a high level in BP cells, and is required for their development, suggest that its role as a terminal selector may require an additional factor(s) for specificity in the genes that it regulates in different cell types.

In addition to the role of *Otx2* in directly regulating transcription, it has been proposed to act as a pioneer factor, regulating access to CRMs within chromatin, notably through collaboration with *Neurod1* (Boulay et al., 2017; Buecker et al., 2014). Similarly, *Onecut* TFs have been proposed to act as pioneer factors, as their misexpression led to the generation of neurons from fibroblasts (van der Raadt et al., 2019), as has been shown to follow overexpression of *Neurog2* (Zhang et al., 2013). The similar phenotypes of neuron induction following *Oc1* and *Neurog2*, and the collaboration of *Otx2* with *Neurod1*, are interesting findings in light of our CUT&RUN motif analysis, in which binding sites for

combinations of these TFs are overrepresented. Moreover, the notion of pioneer activity of *Otx2* and *Oc* factors fits in well with their roles in retinal development. As *Oc* genes are not expressed in cones, and *Otx2* is not expressed in HCs, yet mouse knockouts show a role for both factors in cone and HC development (Nishida et al., 2003; Sapkota et al., 2014; Sato et al., 2007), an early role, perhaps as pioneer factors in RPCs, is supported. As cells exit mitosis to differentiate, the roles of these two TFs may change, and may include some cross-repression (Ghinia Tegla et al., 2020) as well as positive auto-regulation.

Diseases affecting cone photoreceptors, such as retinitis pigmentosa and age-related macular degeneration (AMD), affect the lives of millions of people. The data presented here bring a greater understanding of the processes that might lead to the development of cell-based therapies to treat retinal disease. The engraftment of stem-cell derived cones, the generation of cones from endogenous stem cells, and/or the use of cones for *in vitro* screens of potential therapies, would all benefit from an efficient production of cones. Cones are also a common target for gene therapy, and vectors that direct expression specifically to cones are beneficial for this approach. The CRMs reported here likely will expand the repertoire of CRMs for cone expression, in terms of levels, timing, and/or specificity. Furthermore, there is quite a bit of heterogeneity among individuals with the same retinal disease gene. As multiple genes characterized in our study have been associated with retinal diseases, their associated CRMs, or the motifs identified here, can form the basis of a study for causal variants that might affect the expression of a nearby disease gene (Cherry et al., 2020).

## MATERIALS AND METHODS

### Animal handling

Chick embryo procedures were approved by the Institutional Animal Care and Use Committee at Harvard University.

### Electroporation & AP staining

E5 chick retinas were dissected and electroporated *ex vivo* as previously described (Billings et al., 2010; Matsuda and Cepko, 2004), with 5×50 ms 22.5 V pulses and 950 ms intervals, using a NEPA21 type II Nepagene electroporator. The electroporation chamber was modified as previously described (Montana et al., 2011). DNA was diluted in PBS with 6 µg total for the CRM plasmids, and 3-3.75 µg for the control plasmids, in 60 µl. After 2 days in culture in 10% fetal bovine serum (FBS), 45% DMEM, 45% F12 and 100 U/ml penicillin, retinas were fixed at room temperature (RT) for 30 min in 4% formaldehyde and washed three times in PBS. After fixation, at least two biological duplicates were processed for AP staining at RT (Billings et al., 2010), using 20 µl/ml of NBT/BCIP solution in NTM buffer (pH 9.5), and developed for 4-8 h, or processed for IHC. The coordinates (*Gallus gallus* genome galgal5) or sequences of the regions tested in this study are found in Table S7. Plasmids were constructed using gBlock or PCR to clone the CRM sequences in the Stagia3 backbone (Billings et al., 2010).

### IHC and imaging

Fixed retina were frozen in 30% sucrose/PBS as previously described (Cherry et al., 2011) and 20-30 µm sections were prepared for staining (Emerson and Cepko, 2011). Blocking solution was 0.3% Triton X-100 in 1×PBS. Primary antibodies used in this study were: chicken anti-GFP (1:1000, Abcam, AB13970), rabbit anti-mCherry (1:1000, Abcam, 167453), rabbit anti-*Otx2* (1:200-400, Proteintech, 13497-1-AP), mouse anti-*Rxrg* (1:50, Santa Cruz Biotechnology, sc-365252), rabbit anti-*Oc1* (1:100, Santa Cruz Biotechnology, sc-13050), mouse anti-*Lhx1* [1:30, Developmental Studies Hybridoma Bank (DSHB), 4F2-c], mouse anti-visinin (1:250, DSHB, 7G4), rabbit anti-*Blimp1* (1:1000, GenScript, A01647). Retinas were washed with PBS, mounted with Fluoromount-G

(SouthernBiotech). Retina explants were imaged on a Leica M165FC microscope. Retinal section images were acquired using a Zeiss LSM780 inverted confocal microscope. Images were processed with ImageJ to adjust brightness and contrast.

### FACS sorting for ATAC-seq

E5 retina were electroporated with ThrbCRM1 and CAG-mCherry plasmids and cultured *ex vivo* for 2 days. Retina were dissociated as previously described (Shekhar et al., 2016) using DAPI as a dead cell stain. Cells from retina not electroporated, or electroporated with only ThrbCRM1 or CAG-mCherry were used to determine background. Cells from two to three retinas were collected and sorted as ThrbCRM1+/mCherry+ and ThrbCRM1-/mCherry+ using a BD FACS Aria machine, and processed for ATAC-seq protocol.

### FACS sorting for CRM quantification

Flow cytometry was performed on a Cytex XP11 flow cytometer using its 488 and 561 nm lasers. Cellular debris was gated out from downstream analysis via a FSC-H versus SSC-H plot. Cell doublets and multiplets were subsequently gated out via a FSC-H versus FCS-W plot. Singlet cells were compared between experimental and control conditions to determine the placement of cell populations of interest in fluorescent plots. Cells fluorescing in a particular channel are demonstrated by a shift along the fluorescent axis, compared with non-fluorescing control cells. Gates denoting fluorescently-positive cells were derived from these experimental versus control sample comparisons.

### ATAC-seq

ATAC-seq libraries for each condition were prepared using the standard protocol (Buenrostro et al., 2013). We used ~50,000 cells per condition, from retina cultured 2 days *ex vivo*. The first replicate was performed and sequenced separately. The second and third replicates were composed of cells sorted on the same day from the same pool of dissociated retinas, prepared for ATAC-seq and sequenced in parallel.

### CUT&RUN

We performed the CUT&RUN according to the protocol from (Meers et al., 2019) and available at dx.doi.org/10.17504/protocols.io.zcpcf2vn. E5 WT retina were dissociated as previously described (Shekhar et al., 2016) to collect ~1,300,000 cells. After ConA-coated magnetic bead binding to cells, the cells were split into six tubes for antibody incubation at 4°C overnight. Antibodies used were: rabbit anti-H3K27me3 (C36B11) (1:100, Cell Signaling Technology, 9733T), rabbit anti-mouse IgG H&L (1:100, Abcam, ab46540), rabbit anti-Oc1 (1:100, Santa Cruz Biotechnology, sc-13050) and rabbit anti-Otx2 (1:200, Proteintech, 13497-1-AP). The chromatin digestion and release step was following the protocol option 1: Standard CUT&RUN. Each sample was washed in 300 µl Dig-wash buffer, then we added 6 µl of 100 mM CaCl<sub>2</sub> for chromatin digestion and release and samples were incubated on ice. After 25 min 100 µl was collected and added to a new tube containing 2× STOP Buffer, 100 µl was removed after 30 min and the remaining 100 µl was digested for 45 min before stopping digestion and proceeding with the protocol. Libraries for cells digested for 25 and 30 min were then prepared using the NEBNext Ultra II DNA Library Prep kit (E7645S; New England Biolabs), following the protocol available at dx.doi.org/10.17504/protocols.io.wvgfe3w, except for samples treated with IgG and H3K27me3 antibodies that were prepared following New England Biolabs protocol, as recommended.

### ATAC-seq data analysis

ATAC-seq data sets were aligned to the *Gallus gallus* genome galgal5 using bowtie2 (Langmead and Salzberg, 2012) with -X 1000. MACS2 (Feng et al., 2012) was used to identify the ATAC-seq enriched regions. Parameters -B -SPMR -nomodel -extsize 146 were used while peak calling. MACS2 bdgcmp (-m subtract) was used to calculate the subtraction between two conditions; Peaks with *P*-value ≤ 1e-30 that identified by MACS2 bdgpeakcall based on the subtracted ATAC-seq signal between conditions were defined as the differential peaks. This approach was used as

we found that some ThrbPos high peaks partially overlapped ThrbNeg high peaks, and within such regions, differential enrichment in sub-regions might not be called differential by MACS2. Preliminary analyses of CRM activity within differential sub-regions of such peaks showed that some of these regions displayed specific CRM activity.

### RNA-seq data analysis

RNA-seq data sets were aligned to *Gallus gallus* genome galgal5 using STAR (Dobin et al., 2013) with ENCODE standard options. RSEM (Li and Dewey, 2011) was used to carry out the transcript quantification, and differential expression analysis was performed with DESeq2 (Love et al., 2014).

### Selected peaks activating and repressive function analysis

We used BETA pipeline (Wang et al., 2013) with parameter -d.f. 0.05 to predict different classes of peak activating and repressive function. Regulatory potential for each gene was calculated as  $S_g = \sum e^{-(0.5+4\Delta_i)}$ . All peaks (k) near the transcription start site (TSS) of the gene (g) within 100 kb are considered.  $\Delta$  is the exact distance between a binding site and the TSS proportional to 100 kb ( $\Delta=0.1$  means the exact distance=10 kb). *P*-values listed in each graph were calculated by Kolmogorov–Smirnov test to measure the significance of the upregulated genes group or downregulated genes group relative to static genes group.

### Motif analysis

MDSeqPos (X. Shirley Liu laboratory, Harvard T.H. Chan School of Public Health, MA, USA) was applied to identify binding motifs based on ThrbPos high peaks and ThrbNeg high peaks. All binding sites were trimmed or extended to 600 bp and centered at the center of the peak regions. Motifs were ranked by the *z*-score that was calculated from MDSeqPos, only the top 70 motifs with expression in at least one condition were collected. The list of motifs identified in each condition can be found in Table S3. The enrichment significance in each class is shown in Fig. 1D. Values shown in Fig. 1D are negative *z*-score output from MDSeqPos: the higher the value, the more significant the motif enriched, value=0 represents the lack of enrichment.

### Motif co-occurrence analysis

FIMO (tool from the MEME suite, version 5.0.3, with parameter -thresh 1e-3 -max-stored-scores 2000000) (Grant et al., 2011) was used to search all hits of Otx2 and Oc across the whole genome. Bedtools (shuffleBed) (Quinlan and Hall, 2010) was used to get the random peaks with the same feature of ATAC-seq peaks from the whole genome. Fisher's-exact test was used to calculate the *P*-values between ThrbPos/ThrbNeg high peaks and shuffled peaks.

### CUT&RUN analysis

The reads from the CUT&RUN experiments were aligned to the *Gallus gallus* genome galgal5 using bowtie2 (Langmead and Salzberg, 2012) with the parameters: -local -very-sensitive-local -no-unal -no-mixed -no-discordant -phred33 -I 10 -X 700 and processed with SAMtools (Li et al., 2009) to remove duplicates and MT reads. We generated BigWig coverage tracks using deepTools bamCoverage (Ramírez et al. 2016) with the following parameters: -binSize 1 -normalizeUsing RPGC -effectiveGenomeSize 1046932099. BigWig for all datasets were visualized in IGV Genome browser. Peaks were called using MACS2, with the IgG control of the corresponding digestion time as the background, using the parameter -g 1.03e9. Peaks for Otx2 CUT&RUN that were run in parallel with 25 and 30 min digestion were merged, as was done for Oc1 peaks, using the bedtools merge command (Quinlan and Hall, 2010). To compare how many peaks were bound by both Otx2 and Oc1, we used bedtools intersect with parameter -f 0.5 -F 0.5 -e. Motif analyses of the CUT&RUN merged peaks was performed with HOMER (Heinz et al., 2010), using the parameter -size 50 -p 10.

### scRNA-seq analysis

We used single-cell RNA data from the chick retina (GEO Accession number: GSE142244) (Ghinia Tegla et al., 2020) for our analysis. The WT

sample, GSM4223661 was used for the analysis. Based on the processed UMI count matrix, the cells were subdivided into *Otx2* only, *Ocl1* only, *Otx2* and *Ocl1* double-positive and double-negative cell populations. Log normalization was applied to the dataset to derive the average expression of each subset.

#### Acknowledgements

We thank Bess Miller for her help with the Blimp1 CRM screening, as well as the Microscopy Resources on the North Quad (MicRoN) core, the Department of Immunology's Flow Cytometry Facility, the BWH Flow Cytometry and the Biopolymers Facility cores at Harvard Medical School for their service and support. We thank Nikki Kong for her generous gift of Protein A-MNase. We thank the Cepko and Tabin lab members for valuable discussions and advice, and for sharing reagents.

#### Competing interests

The authors declare no competing or financial interests.

#### Author contributions

Conceptualization: N.L., C.C.; Methodology: N.L., S.W., C.C., C.L.; Software: N.L., S.W., C.L.; Validation: N.L., S.W., C.L.; Formal analysis: N.L., S.W., C.L.; Investigation: N.L., M.G., J.C.; Resources: N.L., S.W., C.L.; Data curation: N.L., S.W., C.L.; Writing - original draft: N.L., C.C.; Writing - review & editing: N.L., S.W., C.L., M.G., P.J.P., C.C.; Visualization: N.L., S.W., C.L.; Supervision: N.L., P.J.P., C.C.; Project administration: N.L., C.C.; Funding acquisition: N.L., P.J.P., C.C.

#### Funding

Support was provided by fellowships from the Schweizerischer Nationalfonds zur Förderung der Wissenschaftlichen Forschung (151974 and 171521) and the Human Frontier Science Program (to N.L.), the National Institutes of Health (C.C., N.L., C.L.) (EYO 29771 and HD032443) and the Howard Hughes Medical Institute (C.C.). Deposited in PMC for release after 12 months.

#### Data availability

The datasets generated during this study are available in the GEO database with the accession numbers GSE151948.

#### References

- Baye, L. M. and Link, B. A. (2008). Nuclear migration during retinal development. *Brain Res.* **1192**, 29-36. doi:10.1016/j.brainres.2007.05.021
- Bernard, C., Kim, H.-T., Torero Ibad, R., Lee, E. J., Simonutti, M., Picaud, S., Acampora, D., Simeone, A., Di Nardo, A. A., Prochiantz, A. et al. (2014). Graded *Otx2* activities demonstrate dose-sensitive eye and retina phenotypes. *Hum. Mol. Genet.* **23**, 1742-1753. doi:10.1093/hmg/ddt562
- Billings, N. A., Emerson, M. M. and Cepko, C. L. (2010). Analysis of thyroid response element activity during retinal development. *PLoS ONE* **5**, e13739. doi:10.1371/journal.pone.0013739
- Blixt, M. K. E. and Hallböök, F. (2016). A regulatory sequence from the retinoid X receptor  $\gamma$  gene directs expression to horizontal cells and photoreceptors in the embryonic chicken retina. *Mol. Vis.* **22**, 1405-1420.
- Boulay, G., Awad, M. E., Riggi, N., Archer, T. C., Iyer, S., Boonseng, W. E., Rossetti, N. E., Naigles, B., Rengarajan, S., Volorio, A. et al. (2017). *OTX2* activity at distal regulatory elements shapes the chromatin landscape of group 3 Medulloblastoma. *Cancer Discov.* **7**, 288-301. doi:10.1158/2159-8290.CD-16-0844
- Buecker, C., Srinivasan, R., Wu, Z., Calo, E., Acampora, D., Faial, T., Simeone, A., Tan, M., Swigut, T. and Wysocka, J. (2014). Reorganization of enhancer patterns in transition from naive to primed pluripotency. *Cell Stem Cell* **14**, 838-853. doi:10.1016/j.stem.2014.04.003
- Buenaventura, D. F., Ghinia-Tegla, M. G. and Emerson, M. M. (2018). Fate-restricted retinal progenitor cells adopt a molecular profile and spatial position distinct from multipotent progenitor cells. *Dev. Biol.* **443**, 35-49. doi:10.1016/j.ydbio.2018.06.023
- Buenrostro, J. D., Giresi, P. G., Zaba, L. C., Chang, H. Y. and Greenleaf, W. J. (2013). Transposition of native chromatin for fast and sensitive epigenomic profiling of open chromatin, DNA-binding proteins and nucleosome position. *Nat. Methods* **10**, 1213-1218. doi:10.1038/nmeth.2688
- Campochiaro, P. A. and Mir, T. A. (2018). The mechanism of cone cell death in Retinitis Pigmentosa. *Prog. Retin. Eye Res.* **62**, 24-37. doi:10.1016/j.preteyeres.2017.08.004
- Cepko, C. (2014). Intrinsically different retinal progenitor cells produce specific types of progeny. *Nat. Rev. Neurosci.* **15**, 615-627. doi:10.1038/nrn3767
- Chan, C. S. Y., Lonfat, N., Zhao, R., Davis, A. E., Li, L., Wu, M.-R., Lin, C.-H., Ji, Z., Cepko, C. L. and Wang, S. (2020). Cell type- and stage-specific expression of *Otx2* is regulated by multiple transcription factors and cis-regulatory modules in the retina. *Development* **147**, dev187922. doi:10.1242/dev.187922
- Cherry, T. J., Wang, S., Bormuth, I., Schwab, M., Olson, J. and Cepko, C. L. (2011). NeuroD factors regulate cell fate and neurite stratification in the developing retina. *J. Neurosci.* **31**, 7365-7379. doi:10.1523/JNEUROSCI.2555-10.2011
- Cherry, T. J., Yang, M. G., Harmin, D. A., Tao, P., Timms, A. E., Bauwens, M., Allikmets, R., Jones, E. M., Chen, R., De Baere, E. et al. (2020). Mapping the cis-regulatory architecture of the human retina reveals noncoding genetic variation in disease. *Proc. Natl. Acad. Sci. USA* **117**, 9001-9012. doi:10.1073/pnas.1922501117
- Dobin, A., Davis, C. A., Schlesinger, F., Drenkow, J., Zaleski, C., Jha, S., Batut, P., Chaisson, M. and Gingeras, T. R. (2013). STAR: ultrafast universal RNA-seq aligner. *Bioinformatics* **29**, 15-21. doi:10.1093/bioinformatics/bts635
- Edqvist, P.-H. D. and Hallböök, F. (2004). Newborn horizontal cells migrate bidirectionally across the neuroepithelium during retinal development. *Development* **131**, 1343-1351. doi:10.1242/dev.01018
- Emerson, M. M. and Cepko, C. L. (2011). Identification of a retina-specific *Otx2* enhancer element active in immature developing photoreceptors. *Dev. Biol.* **360**, 241-255. doi:10.1016/j.ydbio.2011.09.012
- Emerson, M. M., Surzenko, N., Goetz, J. J., Trimarchi, J. and Cepko, C. L. (2013). *Otx2* and *Onecut1* promote the fates of cone photoreceptors and horizontal cells and repress rod photoreceptors. *Dev. Cell* **26**, 59-72. doi:10.1016/j.devcel.2013.06.005
- Enright, J. M., Lawrence, K. A., Hadzic, T. and Corbo, J. C. (2015). Transcriptome profiling of developing photoreceptor subtypes reveals candidate genes involved in avian photoreceptor diversification. *J. Comp. Neurol.* **523**, 649-668. doi:10.1002/cne.23702
- Feng, J., Liu, T., Qin, B., Zhang, Y. and Liu, X. S. (2012). Identifying ChIP-seq enrichment using MACS. *Nat. Protoc.* **7**, 1728-1740. doi:10.1038/nprot.2012.101
- Furuno, K., Ikeda, K., Hamano, S., Fukuyama, K., Sonoda, M., Hara, T., Sasazuki, T. and Yamamoto, K. (2008). *Onecut* transcription factor *OC2* is a direct target of T-bet in type-1 T-helper cells. *Genes Immun.* **9**, 302-308. doi:10.1038/gene.2008.18
- Ghinia Tegli, M. G., Buenaventura, D. F., Kim, D. Y., Thakurdin, C., Gonzalez, K. C. and Emerson, M. M. (2020). *OTX2* represses sister cell fate choices in the developing retina to promote photoreceptor specification. *eLife* **9**, e54279. doi:10.7554/eLife.54279
- Grant, C. E., Bailey, T. L. and Noble, W. S. (2011). FIMO: scanning for occurrences of a given motif. *Bioinformatics* **27**, 1017-1018. doi:10.1093/bioinformatics/btr064
- Hafler, B. P., Surzenko, N., Beier, K. T., Punzo, C., Trimarchi, J. M., Kong, J. H. and Cepko, C. L. (2012). Transcription factor *Olig2* defines subpopulations of retinal progenitor cells biased toward specific cell fates. *Proc. Natl. Acad. Sci. USA* **109**, 7882-7887. doi:10.1073/pnas.1203138109
- Harada, R., Bérubé, G., Tamplin, O. J., Denis-Larose, C. and Nepveu, A. (1995). DNA-binding specificity of the cut repeats from the human cut-like protein. *Mol. Cell. Biol.* **15**, 129-140. doi:10.1128/MCB.15.1.129
- Hatakenaka, S., Kiyama, H., Tohyama, M. and Miki, N. (1985). Immunohistochemical localization of chick retinal 24 kdalton protein (visinin) in various vertebrate retinae. *Brain Res.* **331**, 209-215. doi:10.1016/0006-8993(85)91546-X
- Heinz, S., Benner, C., Spann, N., Bertolino, E., Lin, Y. C., Laslo, P., Cheng, J. X., Murre, C., Singh, H. and Glass, C. K. (2010). Simple combinations of lineage-determining transcription factors prime cis-regulatory elements required for macrophage and B cell identities. *Mol. Cell* **38**, 576-589. doi:10.1016/j.molcel.2010.05.004
- Hobert, O. and Kratsios, P. (2019). Neuronal identity control by terminal selectors in worms, flies, and chordates. *Curr. Opin. Neurobiol.* **56**, 97-105. doi:10.1016/j.conb.2018.12.006
- Jean-Charles, N., Buenaventura, D. F. and Emerson, M. M. (2018). Identification and characterization of early photoreceptor cis-regulatory elements and their relation to *Onecut1*. *Neural Dev.* **13**, 26. doi:10.1186/s13064-018-0121-x
- Klimova, L., Antosova, B., Kuzelova, A., Strnad, H. and Kozmik, Z. (2015). *Onecut1* and *Onecut2* transcription factors operate downstream of *Pax6* to regulate horizontal cell development. *Dev. Biol.* **402**, 48-60. doi:10.1016/j.ydbio.2015.02.023
- Koike, C., Nishida, A., Ueno, S., Saito, H., Sanuki, R., Sato, S., Furukawa, A., Aizawa, S., Matsuo, I., Suzuki, N. et al. (2007). Functional roles of *Otx2* transcription factor in postnatal mouse retinal development. *Mol. Cell Biol.* **27**, 8318-8329. doi:10.1128/MCB.01209-07
- Langmead, B. and Salzberg, S. L. (2012). Fast gapped-read alignment with Bowtie 2. *Nat. Methods* **9**, 357-359. doi:10.1038/nmeth.1923
- Lannoy, V. J., Bürglin, T. R., Rousseau, G. G. and Lemaigre, F. P. (1998). Isoforms of hepatocyte nuclear factor-6 differ in DNA-binding properties, contain a bifunctional homeodomain, and define the new *ONECUT* class of homeodomain proteins. *J. Biol. Chem.* **273**, 13552-13562. doi:10.1074/jbc.273.22.13552
- Li, B. and Dewey, C. N. (2011). RSEM: accurate transcript quantification from RNA-Seq data with or without a reference genome. *BMC Bioinformatics* **12**, 323. doi:10.1186/1471-2105-12-323
- Li, H., Handsaker, B., Wysoker, A., Fennell, T., Ruan, J., Homer, N., Marth, G., Abecasis, G. and Durbin, R., and 1000Genome Project Data Processing Subgroup. (2009). The sequence alignment/Map format and SAMtools. *Bioinformatics* **25**, 2078-2079. doi:10.1093/bioinformatics/btp352

- Liu, W., Wang, J.-H. and Xiang, M. (2000). Specific expression of the LIM/homeodomain protein Lim-1 in horizontal cells during retinogenesis. *Dev. Dyn.* **217**, 320-325. doi:10.1002/(SICI)1097-0177(200003)217:3<320::AID-DVDY10>3.0.CO;2-F
- Liu, Y., Fu, L., Chen, D.-G. and Deeb, S. S. (2007). Identification of novel retinal target genes of thyroid hormone in the human WERI cells by expression microarray analysis. *Vis. Res.* **47**, 2314-2326. doi:10.1016/j.visres.2007.04.023
- Liu, H., Etter, P., Hayes, S., Jones, I., Nelson, B., Hartman, B., Forrest, D. and Reh, T. A. (2008). NeuroD1 regulates expression of thyroid hormone receptor  $\beta$ 2 and cone opsins in the developing mouse retina. *J. Neurosci.* **28**, 749-756. doi:10.1523/JNEUROSCI.4832-07.2008
- Livesey, F. J. and Cepko, C. L. (2001). Vertebrate neural cell-fate determination: lessons from the retina. *Nat. Rev. Neurosci.* **2**, 109-118. doi:10.1038/35053522
- Love, M. I., Huber, W. and Anders, S. (2014). Moderated estimation of fold change and dispersion for RNA-seq data with DESeq2. *Genome Biol.* **15**, 550. doi:10.1186/s13059-014-0550-8
- Masuda, T., Zhang, X., Berlinic, C., Wan, J., Yerrabelli, A., Conner, E. A., Kjellstrom, S., Bush, R., Thorgeirsson, S. S., Swaroop, A. et al. (2014). The transcription factor GTF2IRD1 regulates the topology and function of photoreceptors by modulating photoreceptor gene expression across the retina. *J. Neurosci.* **34**, 15356-15368. doi:10.1523/JNEUROSCI.2089-14.2014
- Matsuda, T. and Cepko, C. L. (2004). Electroporation and RNA interference in the rodent retina in vivo and in vitro. *Proc. Natl. Acad. Sci. USA* **101**, 16-22. doi:10.1073/pnas.2235688100
- Matsumoto, R., Suga, H., Aoi, T., Bando, H., Fukuoka, H., Iguchi, G., Narumi, S., Hasegawa, T., Muguruma, K., Ogawa, W. et al. (2020). Congenital pituitary hypoplasia model demonstrates hypothalamic OTX2 regulation of pituitary progenitor cells. *J. Clin. Invest.* **130**, 641-654. doi:10.1172/JCI127378
- Meers, M. P., Bryson, T. D., Henikoff, J. G. and Henikoff, S. (2019). Improved CUT&RUN chromatin profiling tools. *eLife* **8**, e46314. doi:10.7554/eLife.46314
- Montana, C. L., Myers, C. A. and Corbo, J. C. (2011). Quantifying the activity of cis-regulatory elements in the mouse retina by explant electroporation. *J. Vis. Exp.* **52**, e2821. doi:10.3791/2821
- Morrow, E. M., Furukawa, T., Lee, J. E. and Cepko, C. L. (1999). NeuroD regulates multiple functions in the developing neural retina in rodent. *Development* **126**, 23-36.
- Nishida, A., Furukawa, A., Koike, C., Tano, Y., Aizawa, S., Matsuo, I. and Furukawa, T. (2003). Otx2 homeobox gene controls retinal photoreceptor cell fate and pineal gland development. *Nat. Neurosci.* **6**, 1255-1263. doi:10.1038/nn1155
- Onishi, A., Peng, G.-H., Chen, S. and Blackshaw, S. (2010). Pias3-dependent SUMOylation controls mammalian cone photoreceptor differentiation. *Nat. Neurosci.* **13**, 1059-1065. doi:10.1038/nn.2618
- Patoori, S., Jean-Charles, N., Gopal, A., Sulaiman, S., Gopal, S., Wang, B., Souferi, B. and Emerson, M. M. (2020). Cis-regulatory analysis of Onecut1 expression in fate-restricted retinal progenitor cells. *Neural Dev.* **15**, 5. doi:10.1186/s13064-020-00142-w
- Perez-Cervantes, C., Smith, L. A., Nadadur, R. D., Hughes, A. E. O., Wang, S., Corbo, J. C., Cepko, C., Lonfat, N. and Moskowitz, I. P. (2020). Enhancer transcription identifies cis-regulatory elements for photoreceptor cell types. *Development* **147**, dev184432. doi:10.1242/dev.184432
- Quinlan, A. R. and Hall, I. M. (2010). BEDTools: a flexible suite of utilities for comparing genomic features. *Bioinformatics* **26**, 841-842. doi:10.1093/bioinformatics/btq033
- Ramirez, F., Ryan, D. P., Grünig, B., Bhardwaj, V., Kilpert, F., Richter, A. S., Heyne, S., Dündar, F. and Manke, T. (2016). deepTools2: a next generation web server for deep-sequencing data analysis. *Nucleic Acids Res.* **44**, W160-W165. doi:10.1093/nar/gkw257
- Roberts, M. R., Hendrickson, A., McGuire, C. R. and Reh, T. A. (2005). Retinoid X receptor  $\gamma$  is necessary to establish the S-opsin gradient in cone photoreceptors of the developing mouse retina. *Invest. Ophthalmol. Vis. Sci.* **46**, 2897-2904. doi:10.1167/iovs.05-0093
- Sapkota, D. and Mu, X. (2015). Onecut transcription factors in retinal development and maintenance. *Neural Regen. Res.* **10**, 899-900. doi:10.4103/1673-5374.158350
- Sapkota, D., Chintala, H., Wu, F., Fliesler, S. J., Hu, Z. and Mu, X. (2014). Onecut1 and Onecut2 redundantly regulate early retinal cell fates during development. *Proc. Natl. Acad. Sci. USA* **111**, E4086-E4095. doi:10.1073/pnas.1405354111
- Sato, S., Inoue, T., Terada, K., Matsuo, I., Aizawa, S., Tano, Y., Fujikado, T. and Furukawa, T. (2007). Dkk3-Cre BAC transgenic mouse line: a tool for highly efficient gene deletion in retinal progenitor cells. *Genesis* **45**, 502-507. doi:10.1002/dvg.20318
- Schick, E., McCaffery, S. D., Keblish, E. E., Thakurdin, C. and Emerson, M. M. (2019). Lineage tracing analysis of cone photoreceptor associated cis-regulatory elements in the developing chicken retina. *Sci. Rep.* **9**, 9358. doi:10.1038/s41598-019-45750-7
- Shekhar, K., Lapan, S. W., Whitney, I. E., Tran, N. M., Macosko, E. Z., Kowalczyk, M., Adiconis, X., Levin, J. Z., Nemesh, J., Goldman, M. et al. (2016). Comprehensive classification of retinal bipolar neurons by single-cell transcriptomics. *Cell* **166**, 1308-1323.e30. doi:10.1016/j.cell.2016.07.054
- Skene, P. J. and Henikoff, S. (2017). An efficient targeted nuclease strategy for high-resolution mapping of DNA binding sites. *eLife* **6**, e21856. doi:10.7554/eLife.21856
- Souferi, B. and Emerson, M. M. (2019). Quantitative analysis of the ThrbCRM1-centered gene regulatory network. *Biol. Open* **8**, bio039115. doi:10.1242/bio.039115
- Suzuki, S. C., Bleckert, A., Williams, P. R., Takechi, M., Kawamura, S. and Wong, R. O. L. (2013). Cone photoreceptor types in zebrafish are generated by symmetric terminal divisions of dedicated precursors. *Proc. Natl. Acad. Sci. USA* **110**, 15109-15114. doi:10.1073/pnas.1303551110
- Trimarchi, J. M., Harpavat, S., Billings, N. A. and Cepko, C. L. (2008). Thyroid hormone components are expressed in three sequential waves during development of the chick retina. *BMC Dev. Biol.* **8**, 101. doi:10.1186/1471-213X-8-101
- van der Raadt, J., van Gestel, S. H. C., Nadif Kasri, N. and Albers, C. A. (2019). ONECUT transcription factors induce neuronal characteristics and remodel chromatin accessibility. *Nucleic Acids Res.* **47**, 5587-5602. doi:10.1093/nar/gkz273
- Wang, S., Sun, H., Ma, J., Zang, C., Wang, C., Wang, J., Tang, Q., Meyer, C. A., Zhang, Y. and Liu, X. S. (2013). Target analysis by integration of transcriptome and CHIP-seq data with BETA. *Nat. Protoc.* **8**, 2502-2515. doi:10.1038/nprot.2013.150
- Wang, S., Sengel, C., Emerson, M. M. and Cepko, C. L. (2014). A gene regulatory network controls the binary fate decision of rod and bipolar cells in the vertebrate retina. *Dev. Cell* **30**, 513-527. doi:10.1016/j.devcel.2014.07.018
- Welby, E., Lakowski, J., Di Foggia, V., Budinger, D., Gonzalez-Cordero, A., Lun, A. T. L., Epstein, M., Patel, A., Cuevas, E., Kruczek, K. et al. (2017). Isolation and comparative transcriptome analysis of human fetal and iPSC-derived cone photoreceptor cells. *Stem Cell Rep.* **9**, 1898-1915. doi:10.1016/j.stemcr.2017.10.018
- Wortham, M., Guo, C., Zhang, M., Song, L., Lee, B.-K., Iyer, V. R., Furey, T. S., Crawford, G. E., Yan, H. and He, Y. (2014). Chromatin accessibility mapping identifies mediators of basal transcription and retinoid-induced repression of OTX2 in medulloblastoma. *PLoS ONE* **9**, e107156. doi:10.1371/journal.pone.0107156
- Wu, F., Sapkota, D., Li, R. and Mu, X. (2012). Onecut 1 and Onecut 2 are potential regulators of mouse retinal development. *J. Comp. Neurol.* **520**, 952-969. doi:10.1002/cne.22741
- Yamagata, K., Goto, K., Kuo, C.-H., Kondo, H. and Miki, N. (1990). Visinin: a novel calcium binding protein expressed in retinal cone cells. *Neuron* **4**, 469-476. doi:10.1016/0896-6273(90)90059-0
- Zhang, Y., Pak, C., Han, Y., Ahlenius, H., Zhang, Z., Chanda, S., Marro, S., Patzke, C., Acuna, C., Covy, J. et al. (2013). Rapid single-step induction of functional neurons from human pluripotent stem cells. *Neuron* **78**, 785-798. doi:10.1016/j.neuron.2013.05.029
